# Supplementary material
Source: PubMed Central journal article supplement (PMC3538129)
Supplement: NIHMS419265-supplement-1_si_001.pdf [file NIHMS419265-supplement-1_si_001.pdf]

# Supporting Information

## Molecular Genetic Characterization of a Cluster in *A. terreus* for Biosynthesis of the Meroterpenoid Terretonin

Chun-Jun Guo, Benjamin P. Knox, Yi-Ming Chiang, Hsien-Chun Lo, James F. Sanchez, Kuan-Han Lee, Berl R. Oakley, Kenneth S. Bruno, and Clay C. C. Wang

### Table of contents

|                                                                             |     |
|-----------------------------------------------------------------------------|-----|
| Detailed structural characterization                                        | S2  |
| Supplemental methods                                                        | S3  |
| Compound spectral data                                                      | S5  |
| Supplemental References                                                     | S7  |
| Table S1. Primers used in this study                                        | S8  |
| Table S2. Strains used in this study                                        | S11 |
| Table S3. NMR data for compound <b>9</b>                                    | S12 |
| Table S4. NMR data for compound <b>10</b>                                   | S13 |
| Table S5. NMR data for compound <b>11</b>                                   | S14 |
| Table S6. NMR data for compounds <b>1</b> and <b>2</b>                      | S15 |
| Table S7. NMR data for compounds <b>3</b> and <b>5</b>                      | S16 |
| Table S8. NMR data for compounds <b>4</b> and <b>6</b>                      | S17 |
| Figure S1. Comparison of the <i>trt</i> cluster and the <i>aus</i> clusters | S18 |
| Figure S2. UV-Vis and ESIMS spectra of isolated compounds                   | S19 |
| Figure S3. Schematic of diagnostic PCR screening strategy                   | S20 |
| Figure S4. Diagnostic PCR for all the deletant strains                      | S21 |
| Figures S5-S14: Southern blot figures                                       | S22 |
| Figures S15-S33: NMR spectra of isolated compounds                          | S26 |

## Supplemental Results

### Detailed structural characterization

Compound **10** from *trt3* deletant strain was isolated as an amorphous colorless solid. The molecular formula was established to be C<sub>26</sub>H<sub>36</sub>O<sub>5</sub> by its <sup>13</sup>C NMR, DEPT and HRESIMS spectral data, indicating nine indices of hydrogen deficiency (IHD). The IR spectrum showed hydroxyl (3587 cm<sup>-1</sup>) and ester or ketone functionalities (1733 and 1716 cm<sup>-1</sup>). The <sup>1</sup>H NMR spectrum of compound **10** (Table S4) exhibited signals for six methyl groups [ $\delta_{\text{H}}$  0.97, 1.01, 1.03, 1.06, 1.32, and 1.74 (each 3H, s)], one methoxyl group [ $\delta_{\text{H}}$  3.79 (3H, s)], one vinylidene moiety [ $\delta_{\text{H}}$  5.13 and 5.19 (each 1H, d,  $J = 2.0$  Hz)], and one deshielded hydroxyl proton [ $\delta_{\text{H}}$  9.68 (1H, s)]. The <sup>1</sup>H, <sup>13</sup>C, gHMBC, and gHMBC NMR spectroscopic data of compound **10** (Table S4) including the 3-carbonyl group ( $\delta_{\text{C}}$  217.3), the CH-5 methine group ( $\delta_{\text{H}}$  1.22 and  $\delta_{\text{C}}$  55.2), and four methyl groups ( $\delta_{\text{H}}$  1.06 and  $\delta_{\text{C}}$  27.2, CH<sub>3</sub>-18;  $\delta_{\text{H}}$  1.01 and  $\delta_{\text{C}}$  21.7, CH<sub>3</sub>-19;  $\delta_{\text{H}}$  0.97 and  $\delta_{\text{C}}$  19.6, CH<sub>3</sub>-20; and  $\delta_{\text{H}}$  1.03 and  $\delta_{\text{C}}$  16.0, CH<sub>3</sub>-21) exhibit a typical 3-carbonyl-4,4,8,10-tetramethyl-decalin partial structure that was observed in andrastin D.<sup>1</sup> This suggested that compound **10** was an intermediate biosynthesized before the C6 and C7 of ring B is oxidized as in terretonin (**1**) or terretonin C (**2**). Next we were able to confirm the partial structure of the D ring by identifying the key long-range <sup>1</sup>H-<sup>13</sup>C correlations between CH<sub>3</sub>-24 ( $\delta_{\text{H}}$  1.74) and two carbonyl like carbons ( $\delta_{\text{C}}$  177.6, C-15;  $\delta_{\text{C}}$  205.6, C-17) as well as one olefinic carbon ( $\delta_{\text{C}}$  113.2, C-16) in the gHMBC spectrum. The established structure of D ring was also comparable to that of andrastin D.<sup>1</sup> Besides, we identified the presence of a carboxylic methyl ester by analyzing the gHMBC spectrum that shows a <sup>1</sup>H-<sup>13</sup>C correlation between H<sub>3</sub>-1' ( $\delta_{\text{H}}$  3.79) and C-25 ( $\delta_{\text{C}}$  175.4). We confirmed that this methyl ester group was attached to C-14 ( $\delta_{\text{C}}$  68.1) by comparison to the spectroscopic data of terretonin E and F.<sup>2</sup> Thus, the structure of this meroterpenoid, named preterrenoid, was assigned as shown in Table S4.

Compound **11** was isolated from *trt6* $\Delta$  strain as an amorphous colorless solid. Its molecular formula was established to be C<sub>26</sub>H<sub>36</sub>O<sub>6</sub> by its <sup>13</sup>C NMR, DEPT and HRESIMS spectral data. The <sup>1</sup>H and <sup>13</sup>C NMR spectral data of the A, B and C rings of compound **11** were similar to those of compound **10** (Tables S4 and S5). The major spectral differences of compound **11** compared to **10** were the chemical shift of C-15 ( $\delta_{\text{C}}$  209.5) and C-16 ( $\delta_{\text{C}}$  74.5) in **11**. The gHMBC spectrum of compound **11** showed that there is <sup>1</sup>H-<sup>13</sup>C correlation between H<sub>3</sub>-24 ( $\delta_{\text{H}}$  1.32) with C-15 ( $\delta_{\text{C}}$  209.5), C-16 ( $\delta_{\text{C}}$  74.5) and C-17 ( $\delta_{\text{C}}$  211.0). This indicated that the partial structure of the ring D has been changed to 2-hydroxyl-2-methyl-cyclopentane-1,3-dione. The NOESY correlation between H<sub>3</sub>-23 and H<sub>3</sub>-24 cannot be observed suggesting that the methyl group at C-16 is located on the  $\beta$  face of D ring. Therefore, compound **11** was established to be the structure as shown in Table S5. We named it terrenoid.

## Supplemental methods

### Fermentation and LC-MS analysis:

All *A. terreus* strains were cultivated at 30 °C on LCMM agar plates (6 g/l NaNO<sub>3</sub>, 0.52 g/l KCl, 0.52 g/l MgSO<sub>4</sub>·7H<sub>2</sub>O, 1.52 g/l KH<sub>2</sub>PO<sub>4</sub>, 10 g/l D-glucose, 20 g/l lactose, 15 g/l agar supplemented with 1 ml/l of a trace element solution) at 10 × 10<sup>6</sup> spores per plate (d=10 cm). After 5 days, agar was chopped into small pieces and extracted with 50 ml MeOH followed by 60 ml 1:1 CH<sub>2</sub>Cl<sub>2</sub>/MeOH. The extract was evaporated *in vacuo* to yield a water residue, which was suspended in 25 ml H<sub>2</sub>O and partitioned with 25 ml ethyl acetate (EA). The pH of the water crude was then adjusted to around 2 and the crude was extracted with 25 ml EA for a second time. The combined EA layer was evaporated *in vacuo*, re-dissolved in 1 ml of 20% DMSO in MeOH and a portion (10 μl) was examined by high performance liquid chromatography–photodiode array detection–mass spectrometry (HPLC–DAD–MS) analysis. HPLC–MS was carried out using a ThermoFinnigan LCQ Advantage ion trap mass spectrometer with an RP C<sub>18</sub> column (Alltech Prevail C18 2.1 mm by 100 mm with a 3 μm particle size) at a flow rate of 125 μl/min. The solvent gradient system for HPLC is 0-5 min 100 %-80 % A, 5-35 min 80 %-40 % A, 35-50 min 40 % A, 50-55 min 40 %-0 % A, 55-60 min 0 %-100 % A, 60-65 min 100 % A. (A: 5 % MeCN/H<sub>2</sub>O with 0.05 % formic acid; B: MeCN with 0.05 % formic acid) The condition for MS analysis was carried out as described previously.<sup>3</sup>

### Isolation of secondary metabolites

*A. terreus* wild type and mutant strains were grown at 30 °C on 1 liter LCMM agar plates (D=15 cm) for 5 days. Agar was chopped into small pieces and then soaked in 800 ml of 1:1 CH<sub>2</sub>Cl<sub>2</sub>/MeOH for 24 hrs. After filtration, the crude extract was evaporated *in vacuo* to yield a residue, which was then suspended in 500 ml water and partitioned with EA (500 ml) three times. The pH of the water crude was then adjusted to around 2 and the crude was extracted with EA (500 ml). The combined EA layers were evaporated *in vacuo* to a crude extract. The extract was applied to a silica gel column (Merck, 230 to 400 mesh, ASTM, 20 × 200 mm) and eluted with 250 ml CH<sub>2</sub>Cl<sub>2</sub>/MeOH mixtures of increasing polarity (fraction A, 1:0; fraction B, 19:1; fraction C, 9:1; fraction D, 7:3).

Further purification of the fractions with targeted compounds was carried out by gradient HPLC on a C18 reverse phase column (Phenomenex Luna 5 μm C18 (2), 250 × 10 mm) with a flow rate of 5.0 ml/min and measured by a UV detector at 254 nm. The gradient system was MeCN (solvent B) and 5 % MeCN/H<sub>2</sub>O (solvent A) both containing 0.05 % TFA.

The LC-MS profiles of each fraction of *A. terreus* NIH2624 indicated that fraction B (246 mg) contained compounds **1-6**. The gradient condition for semi-preparative HPLC analysis was 0-2 min 100 % A, 2-32 min 100 % -0 % A, 32-34 min 0 % A,

34-38 min 100 % A. Compound **3** (5.35 mg/L of medium), **4** (5.21 mg/L of medium), **2** (8.12 mg/L of medium), **5** (9.19 mg/L of medium) was eluted at 19.1 min, 19.6 min, 23.2 min, and 22.7 min. Compounds **1** and **6** were eluted in the same fraction at 25.1 min, which was further purified using a different gradient system (0-2 min 100 %-70 % A, 2-32 min 70 % A, 32-34 min 70 %-0% A, 34-36 min 0 %-100 % A, 36-38 min 100 % A) to yield pure compound **1** (7.46 mg/L of medium) and **6** (5.41 mg/L of medium) at retention times of 29.3 min and 30.8 min, respectively.

The LC-MS profiles of each fraction of *trt3Δ* indicated that fraction B (250 mg) contained compound **10**. The gradient condition for this deletant strain was 0-2 min 100 % A, 2-25 min 40 % -32.3 % A, 25-27 min 32.3 %-0 % A, 29-34 min 100 % A. Compound **10** (3.96 mg/L of medium) was eluted at 10.94 min.

The LC-MS profiles of each fraction of *trt5Δ* indicated that fraction B (203 mg) contained compound **7** (3.34 mg/L of medium) and the daggered intermediate (Figure 1). The gradient condition was 0-2 min 100 %-80 % A, 2-17 min 80 % -60 % A, 17-19 min 60 %-0 % A, 19-21 min 0 %-100 % A, 21-23 min 100 % A. However, the daggered intermediate was unstable and the increasing accumulation of compound **7** was observed upon isolation.

For strain *trt6Δ*, the LC-MS profiles of each fraction showed that fraction B (181 mg) had compound **11**. The HPLC gradient system was 0-2 min 100 % A, 2-32 min 100 % -0 % A, 32-34 min 0 % A, 34-36 min 0 %-100 % A, 36-38 min 100 % A. And compound **11** (5.82 mg/L of medium) was eluted at 25.7 min.

For strain *trt8Δ*, the LC-MS profiles of each fraction showed that fraction B (124 mg) had target intermediates. The gradient system was 0-2 min 100 %-80 % A, 2-32 min 80 %-40 % A, 32-44 min 40 %-0 % A, 44-46 min 0 %-100 % A, 46-48 min 100 % A. One new intermediate was eluted at 26.7 min. However, this intermediate was unstable and was further purified using a different gradient system (0-2 min 100 %-47 % A, 2-17 min 40 % A, 17-19 min 40 %-100% A, 19-21 min 100 % A) to give compound **8** (6.59 mg/L of medium).

The LC-MS profiles of each fraction of *trt9Δ* indicated that fraction B (190 mg) contained compound **9**. The gradient condition for this mutant strain was 0-2 min 100 %-60 % A, 2-30 min 60 % A, 30-32 min 60 %-0 % A, 32-34 min 0 % A, 34-36 min 0 % A-100 % A, 36-38 min 0 % A ). Compound **9** (6.52 mg/L of medium) was eluted at 28.4 min.

## Compound spectral data

Melting points were determined with a Yanagimoto micromelting point apparatus and are uncorrected. IR spectra were recorded on a GlobalWorks Cary 14 Spectrophotometer. Optical rotations were measured on a JASCO P-200 digital polarimeter. NMR spectra were collected on a Varian Mercury plus 400 spectrometer.

**Terretonin (1).** Colorless solid, mp 242-243 °C;  $[\alpha]_D^{24}$  -107.9 (CHCl<sub>3</sub>, *c* 0.6); IR  $\nu_{\max}^{\text{ZnSe}}$  3425, 3328, 2966, 2950, 2364, 1776, 1747, 1733, 1710, 1683, 1646, 1432, 1349, 1265, 1180, 1103 cm<sup>-1</sup>; For UV-Vis and ESIMS spectra, see Figure S2; For NMR spectra, see Table S6. The NMR data were in good agreement with the published data.<sup>4</sup>

**Terretonin C (2).** Colorless solid, mp 240-241 °C;  $[\alpha]_D^{24}$  -106.6 (CHCl<sub>3</sub>, *c* 0.5); IR  $\nu_{\max}^{\text{ZnSe}}$  3747, 3635, 3444, 2983, 1762, 1736, 1707, 1684, 1641, 1554, 1452, 1191, 1176 cm<sup>-1</sup>; For UV-Vis and ESIMS spectra, see Figure S2; For NMR spectra, see Table S6; The NMR data were in good agreement with the published data.<sup>5</sup>

**Asterrelenin (3).** Colorless needles, mp 209-210 °C;  $[\alpha]_D^{24}$  150.9 (CH<sub>3</sub>OH, *c* 0.1); IR  $\nu_{\max}^{\text{ZnSe}}$  3284, 2370, 1716, 1699, 1673, 1646, 1627, 1542, 1506, 1481, 1405, 1375, 1340, 1207, 1178, 1164, 1135 cm<sup>-1</sup>; For UV-Vis and ESIMS spectra, see Figure S2; For NMR spectra, see Table S7; The NMR data were in good agreement with the published data.<sup>5</sup>

**Butyrolactone III (4).** Colorless amorphous solid;  $[\alpha]_D^{24}$  32.3 (CH<sub>3</sub>OH, *c* 0.2); IR  $\nu_{\max}^{\text{ZnSe}}$  3853, 3801, 3675, 3567, 1749, 1733, 1652, 1608, 1542, 1508, 1396, 1270, 1255, 1205, 1182, 1143 cm<sup>-1</sup>; For UV-Vis and ESIMS spectra, see Figure S2; For NMR spectra, see Table S8; The NMR data were in good agreement with the published data.<sup>6,7</sup>

**Epi-aszonalenin A (5).** Colorless solid, mp 251-252 °C;  $[\alpha]_D^{24}$  321.9 (CHCl<sub>3</sub>, *c* 0.1); IR  $\nu_{\max}^{\text{ZnSe}}$  2360, 2337, 1695, 1683, 1672, 1658, 1645, 1479, 1437, 1406, 1385, 1211, 1176, 1167, 1135 cm<sup>-1</sup>; For UV-Vis and ESIMS spectra, see Figure S2; For NMR spectra, see Table S7; The NMR data were in good agreement with the published data.<sup>8</sup>

**Butyrolactone I (6).** Colorless amorphous solid;  $[\alpha]_D^{24}$  74.9 (CH<sub>3</sub>OH, *c* 0.4); IR  $\nu_{\max}^{\text{ZnSe}}$  3735, 3654, 3392, 2368, 1768, 1754, 1745, 1733, 1610, 1558, 1538, 1519, 1276, 1255, 1172 cm<sup>-1</sup>; For UV-Vis and ESIMS spectra, see Figure S2; For NMR spectra, see Table S8. The NMR data were in good agreement with the published data.<sup>7</sup>

**3,5-Dimethylorsellinic acid (7).** Colorless needles, mp 195-198 °C; IR  $\nu_{\max}^{\text{ZnSe}}$  3837,

2950, 1953, 1627, 1456, 1259, 1157, 1025  $\text{cm}^{-1}$ ; For UV-Vis and ESIMS spectra, see Figure S2;  $^1\text{H}$  NMR (acetone- $d_6$ , 400 MHz)  $\delta$  2.08 (3H, s), 2.15 (3H, s), 2.50 (3H, s). The NMR data were in good agreement with the published data.<sup>9</sup>

**3,5-Dimethylorsellinate (8)**. Colorless needle, mp 100-102  $^\circ\text{C}$ ; IR  $\nu_{\text{max}}^{\text{ZnSe}}$  3307, 3255, 2985, 1675, 1646, 1335, 1219, 1105, 972  $\text{cm}^{-1}$ ; For UV-Vis and ESIMS spectra, see Figure S2;  $^1\text{H}$  NMR ( $\text{CD}_3\text{OD}$ , 400 MHz)  $\delta$  2.06 (3H, s), 2.11 (3H, s), 2.38 (3H, s), 3.90 (3H, s). The NMR data were in good agreement with the published data.<sup>10</sup>

**Preterretonin A (9)**. Colorless amorphous solid;  $[\alpha]_{\text{D}}^{24}$  -185.9 ( $\text{CHCl}_3$ ,  $c$  0.1); IR  $\nu_{\text{max}}^{\text{ZnSe}}$  3674, 3649, 2987, 2937, 2362, 2330, 1736, 1684, 1653, 1558, 1473, 1456, 1039, 1018  $\text{cm}^{-1}$ ; For UV-Vis and ESIMS spectra, see Figure S2; For NMR spectra, see Table S3. The NMR data were in good agreement with the published data.<sup>11</sup>

**Preterrenoid (10)**. Colorless amorphous solid;  $[\alpha]_{\text{D}}^{24}$  -77.4 ( $\text{CHCl}_3$ ,  $c$  0.1); IR  $\nu_{\text{max}}^{\text{ZnSe}}$  3853, 3743, 3629, 3587, 2937, 2364, 2343, 1733, 1716, 1699, 1686, 1620, 1456, 1404, 1250, 1207, 1138  $\text{cm}^{-1}$ ; For UV-Vis and ESIMS spectra, see Figure S2; For NMR spectra, see Table S4.

**Terrenoid (11)**. Colorless amorphous solid;  $[\alpha]_{\text{D}}^{24}$  -145.1 ( $\text{CH}_3\text{OH}$ ,  $c$  0.1); IR  $\nu_{\text{max}}^{\text{ZnSe}}$  3726, 3631, 2360, 2341, 1623, 1558, 1541, 1209, 1099  $\text{cm}^{-1}$ ; For UV-Vis and ESIMS spectra, see Figure S2; For NMR spectra, see Table S5.

### Supplementary Reference

- (1). Uchida, R.; Shiomi, K.; Inokoshi, J.; Tanaka, H.; Iwai, Y.; Omura, S. *J. Antibiot. (Tokyo)* **1996**, *49*, 1278.
- (2). Lopez-Gresa, M. P.; Cabedo, N.; Gonzalez-Mas, M. C.; Ciavatta, M. L.; Avila, C.; Primo, J. *J. Nat. Prod.* **2009**, *72*, 1348.
- (3). Bok, J. W.; Chiang, Y. M.; Szewczyk, E.; Reyes-Dominguez, Y.; Davidson, A. D.; Sanchez, J. F.; Lo, H. C.; Watanabe, K.; Strauss, J.; Oakley, B. R.; Wang, C. C.; Keller, N. P. *Nat. Chem. Biol.* **2009**, *5*, 462.
- (4). Springer, J. P.; Dorner, J. W.; Cole, R. J.; Cox, R. H. *J. Org. Chem.* **1979**, *44*, 4852.
- (5). Li, G.-Y.; Li, B.-G.; Yang, T.; Yin, J.-H.; Qi, H.-Y.; Liu, G.-Y.; Zhang, G.-L. *J. Nat. Prod.* **2005**, *68*, 1243.
- (6). Nitta, K.; Fujita, N.; Yoshimura, T.; Arai, K.; Yamamoto, Y. *Chem. Pharm. Bull.* **1983**, *31*, 1528.
- (7). Rao, K. V.; Sadhukhan, A. K.; Veerender, M.; Ravikumar, V.; Mohan, E. V.; Dhanvantri, S. D.; Sitaramkumar, M.; Babu, J. M.; Vyas, K.; Reddy, G. O. *Chem. Pharm. Bull.* **2000**, *48*, 559.
- (8). Rank, C.; Phipps, R. K.; Harris, P.; Frisvad, J. C.; Gottfredsen, C. H.; Larsen, T. O. *Tetrahedron Lett.* **2006**, *47*, 6099.
- (9). Akira, H.; Yasujiro, M.; Hiroshi, H. *Biosci., Biotechnol., Biochem.* **1997**, *61*, 647.
- (10). Soman, A. G.; Gloer, J. B.; Wicklow, D. T. *J. Nat. Prod.* **1999**, *62*, 386.
- (11). Matsuda, Y.; Awakawa, T.; Itoh, T.; Wakimoto, T.; Kushiro, T.; Fujii, I.; Ebizuka, Y.; Abe, I. *ChemBiochem* **2012**, *13*, 1738.





---

ATEG\_10082.1F1 GTTGCAGGTACCAATGCTTT  
 ATEG\_10082.1F2 GGTTGCTACGGATCTCTTGG  
 ATEG\_10082.1R3 TGACCTCCACTAGCTCCAGCGAGGCGAGAGGCATACAAAC  
 ATEG\_10082.1F4 AATAGAGTAGATGCCGACCGGAGGCATATCGGCTTCTTGA  
 ATEG\_10082.1F5 GCAGACCGCTGGTTTCTTAG  
 ATEG\_10082.1R6 CTTTGGGAGGAGGTGGAGAG

---

ATEG\_10083.1F1 AAAGTGATCCCATCGAGACG  
 ATEG\_10083.1F2 GCCCATATTCTGTCCACCAG  
 ATEG\_10083.1R3 TGACCTCCACTAGCTCCAGCCCTGGAGAGCAGATCAAAGC  
 ATEG\_10083.1F4 AATAGAGTAGATGCCGACCGCAGGATGGTTGGATAGTCTCG  
 ATEG\_10083.1F5 GGTTCTAGCGTCGGTATCA  
 ATEG\_10083.1R6 CTCGGGTGTTGTCTCAAGC

---

ATEG\_10084.1F1 CAACGTCGGTAACCCTCTGT  
 ATEG\_10084.1F2 TTGATAGAGGGTCTCCAGGA  
 ATEG\_10084.1R3 TGACCTCCACTAGCTCCAGCATCCGAAGTGGTCCAATGAC  
 ATEG\_10084.1F4 AATAGAGTAGATGCCGACCGTCGACCGAGTTTTCTTCAGG  
 ATEG\_10084.1F5 CGACGCTAGGAACCTGATCT  
 ATEG\_10084.1R6 AGACAAAGTCCCATCCAACG

---

ATEG\_10085.1F1 GATGACTGTGAAAGCGTTGG  
 ATEG\_10085.1F2 CATCCACGTTGAAGGCTAGG  
 ATEG\_10085.1R3 TGACCTCCACTAGCTCCAGCCGCCTTTGTGAGTTTTGACC  
 ATEG\_10085.1F4 AATAGAGTAGATGCCGACCGACTGGGGTGGAAAGATCCTC  
 ATEG\_10085.1F5 ACTGATGCGGGAGGTAATTG  
 ATEG\_10085.1R6 ATCGCTGGGATCATGGATAG

---

ATEG\_10086.1F1 GAAGATCGCACCGTTGCTT  
 ATEG\_10086.1F2 GCAAACCTGACGGGCTTAGAA  
 ATEG\_10086.1R3 TGACCTCCACTAGCTCCAGCGATACCCGATGCACTTCCAG  
 ATEG\_10086.1F4 AATAGAGTAGATGCCGACCGTTCCTCCCTAGATCCGTAGA  
 ATEG\_10086.1F5 TTGGCATTTCATGTCGGTCT  
 ATEG\_10086.1R6 GTGATCGTTCCTGATTTGG

---

ATEG\_10087.1F1 ATTGCCAGACGGAGCTTCTA  
 ATEG\_10087.1F2 AGCTTCTAGCAAGCATCATCC  
 ATEG\_10087.1R3 TGACCTCCACTAGCTCCAGCATCTTGCCTGGGTTGGAGTA  
 ATEG\_10087.1F4 AATAGAGTAGATGCCGACCGCGGTATTTAGTCAAGCTGTGG  
 ATEG\_10087.1F5 CATATATCTGCCGGGATTGG  
 ATEG\_10087.1R6 AGCGTATCCGTCTGTAGCAT

---

ATEG\_10088.1F1 CGGACCACTTGAGGAAAGAA  
 ATEG\_10088.1F2 TGGGTCTCTTCCAGACAGTG  
 ATEG\_10088.1R3 TGACCTCCACTAGCTCCAGCAGGCTTTGCTCGGCTATTTT  
 ATEG\_10088.1F4 AATAGAGTAGATGCCGACCGCGGTACGAGGTGATGTCGTT  
 ATEG\_10088.1F5 GCACCATATCAGCCCACTTT  
 ATEG\_10088.1R6 ACCATGCGCTATCTCTCGAT

---

ATEG\_10089.1F1 CCACCAAGAAGCATAGGAGGT  
 ATEG\_10089.1F2 GGGACTAGGGAAACACTTCCA

ATEG\_10089.1R3 TGACCTCCACTAGCTCCAGCGAGGTGCCAAGCACTTCAAC

ATEG\_10089.1F4 AATAGAGTAGATGCCGACCGCGGGTGGGATATGAACAAGA

ATEG\_10089.1F5 ACTCTGCTGCAACAGCTGGA

ATEG\_10089.1R6 TCCGGACCTTTCAAGAAGTG

---

Hscr TGACCTCCACTAGCTCCAGC

---

**Table S2.** *A. terreus* strains used in this study

| Fungal strain or transformants | Gene mutation(s) | Genotype                  |
|--------------------------------|------------------|---------------------------|
| <i>A. terreus</i> NIH2624      | -                | Wildtype                  |
| CW6001.4                       | ATEG_10075.1Δ    | ATEG_10075.1:: <i>hph</i> |
| CW6002.8                       | ATEG_10076.1Δ    | ATEG_10076.1:: <i>hph</i> |
| CW6003.3                       | ATEG_10077.1Δ    | ATEG_10077.1:: <i>hph</i> |
| CW6004.3                       | ATEG_10078.1Δ    | ATEG_10078.1:: <i>hph</i> |
| CW6005.4                       | ATEG_10079.1Δ    | ATEG_10079.1:: <i>hph</i> |
| CW6006.5                       | ATEG_10080.1Δ    | ATEG_10080.1:: <i>hph</i> |
| CW6007.5                       | ATEG_10081.1Δ    | ATEG_10081.1:: <i>hph</i> |
| CW6008.4                       | ATEG_10082.1Δ    | ATEG_10082.1:: <i>hph</i> |
| CW6009.2                       | ATEG_10083.1Δ    | ATEG_10083.1:: <i>hph</i> |
| CW6010.3                       | ATEG_10084.1Δ    | ATEG_10084.1:: <i>hph</i> |
| CW6011.1                       | ATEG_10085.1Δ    | ATEG_10085.1:: <i>hph</i> |
| CW6012.5                       | ATEG_10086.1Δ    | ATEG_10086.1:: <i>hph</i> |
| CW6013.3                       | ATEG_10087.1Δ    | ATEG_10087.1:: <i>hph</i> |
| CW6014.3                       | ATEG_10088.1Δ    | ATEG_10088.1:: <i>hph</i> |
| CW6015.1                       | ATEG_10089.1Δ    | ATEG_10089.1:: <i>hph</i> |

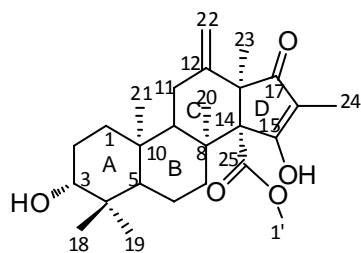

Preterretonin A (9)

**Table S3.** NMR data for compound **9** (400 and 100 MHz in CDCl<sub>3</sub>)

| Position          | $\delta\text{H}$ ( $J$ in Hz)                                                   | $\delta\text{C}$       |
|-------------------|---------------------------------------------------------------------------------|------------------------|
| 1                 | H <sub>a</sub> : 1.36, m<br>H <sub>β</sub> : 0.88, m                            | 38.7, CH <sub>2</sub>  |
| 2                 | 1.58, m                                                                         | 27.0, CH <sub>2</sub>  |
| 3                 | 3.22, m                                                                         | 79.0, CH               |
| 4                 | —                                                                               | 38.4, C                |
| 5                 | 0.59, d (12.0)                                                                  | 55.6, CH               |
| 6                 | H <sub>a</sub> : 1.54, m<br>H <sub>β</sub> : 1.33, m                            | 18.7, CH <sub>2</sub>  |
| 7                 | H <sub>a</sub> : 1.74, m<br>H <sub>β</sub> : 1.55, m                            | 38.7, CH <sub>2</sub>  |
| 8                 | —                                                                               | 45.2, C                |
| 9                 | 1.26, m                                                                         | 45.7, CH               |
| 10                | —                                                                               | 38.4, C                |
| 11                | H <sub>a</sub> : 2.19, dd (16.8, 8.0)<br>H <sub>β</sub> : 2.43, dd (16.8, 12.0) | 29.0, CH <sub>2</sub>  |
| 12                | —                                                                               | 143.8, C               |
| 13                | —                                                                               | 57.6, C                |
| 14                | —                                                                               | 68.5, C                |
| 15                | —                                                                               | 179.0, C <sup>a</sup>  |
| 16                | —                                                                               | 113.2, C               |
| 17                | —                                                                               | 205.7, C <sup>a</sup>  |
| 18                | 0.96, s                                                                         | 28.2, CH <sub>3</sub>  |
| 19                | 0.76, s                                                                         | 16.0, CH <sub>3</sub>  |
| 20                | 0.94, s                                                                         | 19.9, CH <sub>3</sub>  |
| 21                | 0.94, s                                                                         | 16.2, CH <sub>3</sub>  |
| 22                | a: 5.12, d (2.0)<br>b: 5.18, brs                                                | 114.0, CH <sub>2</sub> |
| 23                | 1.32, s                                                                         | 23.7, CH <sub>3</sub>  |
| 24                | 1.75, s                                                                         | 6.15, CH <sub>3</sub>  |
| 25                | —                                                                               | 175.3, C               |
| -OCH <sub>3</sub> | 3.79, s                                                                         | 52.1, CH <sub>3</sub>  |
| -OH               | —                                                                               | —                      |

<sup>a</sup>: This carbon is identified in the HMBC spectrum.

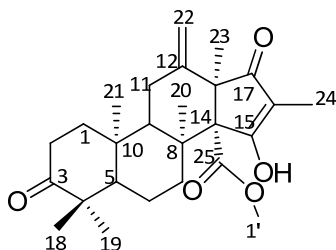

Preterrenoid (**10**)

**Table S4.** NMR data for compound **10** (400 and 100 MHz in CDCl<sub>3</sub>)

| Position          | $\delta$ H (J in Hz)                                                  | $\delta$ C             | HMBC <sup>a</sup> | COSY                                                                         | NOESY                                                                            |
|-------------------|-----------------------------------------------------------------------|------------------------|-------------------|------------------------------------------------------------------------------|----------------------------------------------------------------------------------|
| 1                 | H <sub>β</sub> : 1.37, m<br>H <sub>α</sub> : 1.79, m                  | 39.3, CH <sub>2</sub>  | 2, 3, 5, 10       | H <sub>α</sub> -1, H <sub>2</sub> -2<br>H <sub>β</sub> -1, H <sub>2</sub> -2 | H-9<br>H <sub>3</sub> -21                                                        |
| 2                 | 2.40, m                                                               | 33.9, CH <sub>2</sub>  | 1, 3              | H <sub>2</sub> -1                                                            |                                                                                  |
| 3                 | —                                                                     | 217.3, C               |                   |                                                                              |                                                                                  |
| 4                 | —                                                                     | 47.3, C                |                   |                                                                              |                                                                                  |
| 5                 | 1.22, br t (10.4)                                                     | 55.2, CH               | 4, 10, 18, 19     | H <sub>2</sub> -6                                                            | H <sub>β</sub> -7, H <sub>3</sub> -18                                            |
| 6                 | 1.51, m                                                               | 20.0, CH <sub>2</sub>  | 5, 7, 8           | H-5, H <sub>2</sub> -7                                                       | H <sub>3</sub> -19                                                               |
| 7                 | H <sub>α</sub> : 1.72, m<br>H <sub>β</sub> : 1.53, m                  | 38.2, CH <sub>2</sub>  | 5, 6              | H <sub>2</sub> -6, H <sub>β</sub> -7<br>H <sub>2</sub> -6, H <sub>α</sub> -7 | H-5                                                                              |
| 8                 | —                                                                     | 38.2, C                |                   |                                                                              |                                                                                  |
| 9                 | 1.35, m                                                               | 44.7, CH               | 1, 8, 10, 11      | H <sub>2</sub> -11                                                           | H <sub>β</sub> -1                                                                |
| 10                | —                                                                     | 42.9, C                |                   |                                                                              |                                                                                  |
| 11                | H <sub>β</sub> : 2.47, m<br>H <sub>α</sub> : 2.25, dd<br>(16.0, 12.0) | 28.9, CH <sub>2</sub>  | 9, 12, 13, 22     | H-9, H <sub>α</sub> -11<br>H-9, H <sub>β</sub> -11,                          | H <sub>α</sub> -11<br>H <sub>β</sub> -11, H <sub>3</sub> -21                     |
| 12                | —                                                                     | 143.8, C               |                   |                                                                              |                                                                                  |
| 13                | —                                                                     | 57.8, C                |                   |                                                                              |                                                                                  |
| 14                | —                                                                     | 68.1, C                |                   |                                                                              |                                                                                  |
| 15                | —                                                                     | 177.6, C               |                   |                                                                              |                                                                                  |
| 16                | —                                                                     | 113.2, C               |                   |                                                                              |                                                                                  |
| 17                | —                                                                     | 205.6, C               |                   |                                                                              |                                                                                  |
| 18                | 1.06, s                                                               | 27.2, CH <sub>3</sub>  | 3, 4, 5, 19       |                                                                              | H-5                                                                              |
| 19                | 1.01, s                                                               | 21.7, CH <sub>3</sub>  | 3, 4, 5, 18       |                                                                              | H <sub>3</sub> -21, H-6                                                          |
| 20                | 0.97, s                                                               | 19.6, CH <sub>3</sub>  | 7, 8, 9, 14       |                                                                              | H <sub>3</sub> -21, H <sub>3</sub> -23                                           |
| 21                | 1.03, s                                                               | 16.0, CH <sub>3</sub>  | 1, 9, 10          |                                                                              | H <sub>α</sub> -1, H <sub>α</sub> -11,<br>H <sub>3</sub> -19, H <sub>3</sub> -20 |
| 22                | a: 5.13,brd (2.0)<br>b: 5.19,brd (2.0)                                | 114.0, CH <sub>2</sub> | 11, 13            |                                                                              | H <sub>β</sub> -22, H <sub>3</sub> -23<br>H <sub>α</sub> -22                     |
| 23                | 1.32, s                                                               | 23.7, CH <sub>3</sub>  | 12, 13, 14,<br>17 |                                                                              | H <sub>3</sub> -20, H <sub>α</sub> -22                                           |
| 24                | 1.74, s                                                               | 6.25, CH <sub>3</sub>  | 15, 16, 17        |                                                                              |                                                                                  |
| 25                | —                                                                     | 175.4, C               |                   |                                                                              |                                                                                  |
| -OCH <sub>3</sub> | 3.79, s                                                               | 52.1, CH <sub>3</sub>  | 25                |                                                                              |                                                                                  |
| -OH               | 9.68, s                                                               |                        | 14, 15, 16        |                                                                              |                                                                                  |

<sup>a</sup>: HMBC correlations are from proton(s) to the indicated carbon.

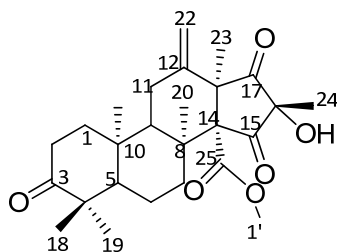

Terrenoid (**11**)

**Table S5.** NMR data for compound **11** (400 and 100 MHz in CD<sub>3</sub>OD)

| Position          | $\delta$ H ( <i>J</i> in Hz)                                                | $\delta$ C             | HMBC <sup>a</sup> | COSY                                                                                         | NOESY                                                                                                                         |
|-------------------|-----------------------------------------------------------------------------|------------------------|-------------------|----------------------------------------------------------------------------------------------|-------------------------------------------------------------------------------------------------------------------------------|
| 1                 | H <sub>β</sub> : 2.02, m<br>H <sub>α</sub> : 1.40, m                        | 38.9, CH <sub>2</sub>  | 2, 3, 10          | H <sub>α</sub> -1, H <sub>2</sub> -2<br>H <sub>β</sub> -1, H <sub>2</sub> -2                 | H <sub>α</sub> -1, H <sub>β</sub> -11<br>H <sub>β</sub> -1, H <sub>3</sub> -21                                                |
| 2                 | H <sub>α</sub> : 2.06, m<br>H <sub>β</sub> : 2.54, m                        | 33.3, CH <sub>2</sub>  | 1, 3              | H <sub>β</sub> -2, H <sub>2</sub> -1<br>H <sub>α</sub> -2, H <sub>2</sub> -1                 | H <sub>β</sub> -2<br>H <sub>α</sub> -2                                                                                        |
| 3                 | —                                                                           | 218.7, C               |                   |                                                                                              |                                                                                                                               |
| 4                 | —                                                                           | 48.3, C                |                   |                                                                                              |                                                                                                                               |
| 5                 | 1.53, dd (9.6, 2.0)                                                         | 54.0, CH               | 4, 10, 18, 19     | H <sub>2</sub> -6                                                                            | H-9, H <sub>3</sub> -18                                                                                                       |
| 6                 | H <sub>β</sub> : 1.52, m<br>H <sub>α</sub> : 1.66, td (12.8, 2.8)           | 18.9, CH <sub>2</sub>  | 5, 7              | H-5, H <sub>α</sub> -6,<br>H <sub>2</sub> -7<br>H-5, H <sub>β</sub> -6,<br>H <sub>2</sub> -7 | H <sub>α</sub> -6<br>H <sub>β</sub> -6, H <sub>3</sub> -19                                                                    |
| 7                 | H <sub>α</sub> : 2.96, td (13.2, 4.0)<br>H <sub>β</sub> : 2.04, m           | 33.7, CH <sub>2</sub>  | 6, 8, 20          | H <sub>2</sub> -6, H <sub>β</sub> -7<br>H <sub>2</sub> -6, H <sub>α</sub> -7                 | H <sub>β</sub> -7<br>H <sub>α</sub> -7                                                                                        |
| 8                 | —                                                                           | 40.5, C                |                   |                                                                                              |                                                                                                                               |
| 9                 | 1.44, dd (10.8, 4.0)                                                        | 50.5, CH               | 7, 10, 11         | H <sub>2</sub> -11                                                                           | H-5                                                                                                                           |
| 10                | —                                                                           | 37.1, C                |                   |                                                                                              |                                                                                                                               |
| 11                | H <sub>β</sub> : 2.43, dd (14.0, 3.6)<br>H <sub>α</sub> : 2.66, br t (14.0) | 27.91, CH <sub>2</sub> | 9, 12             | H-9,<br>H <sub>α</sub> -11<br>H-9,<br>H <sub>β</sub> -11,                                    | H <sub>β</sub> -1, H <sub>α</sub> -11,<br>H <sub>β</sub> -22<br>H <sub>β</sub> -11, H <sub>3</sub> -20,<br>H <sub>3</sub> -21 |
| 12                | —                                                                           | 145.5, C               |                   |                                                                                              |                                                                                                                               |
| 13                | —                                                                           | 58.1, C                |                   |                                                                                              |                                                                                                                               |
| 14                | —                                                                           | 72.9, C                |                   |                                                                                              |                                                                                                                               |
| 15                | —                                                                           | 209.5, C               |                   |                                                                                              |                                                                                                                               |
| 16                | —                                                                           | 74.5, C                |                   |                                                                                              |                                                                                                                               |
| 17                | —                                                                           | 211.0, C               |                   |                                                                                              |                                                                                                                               |
| 18                | 1.12, s                                                                     | 25.9, CH <sub>3</sub>  | 3, 4, 5, 19       |                                                                                              | H-5                                                                                                                           |
| 19                | 1.06, s                                                                     | 20.5, CH <sub>3</sub>  | 3, 4, 5, 18       |                                                                                              | H <sub>α</sub> -6, H <sub>3</sub> -21                                                                                         |
| 20                | 1.35, s                                                                     | 17.5, CH <sub>3</sub>  | 7, 8, 9, 14       |                                                                                              | H <sub>α</sub> -11, H <sub>3</sub> -21,<br>H <sub>3</sub> -23                                                                 |
| 21                | 1.07, s                                                                     | 14.6, CH <sub>3</sub>  | 1, 9, 10          |                                                                                              | H <sub>α</sub> -1, H <sub>α</sub> -11,<br>H <sub>3</sub> -19, H <sub>3</sub> -20                                              |
| 22                | H <sub>a</sub> : 4.74, d (2.0)<br>H <sub>b</sub> : 5.05, d (2.0)            | 114.4, CH <sub>2</sub> | 11, 13            | H <sub>β</sub> -11<br>H <sub>β</sub> -11                                                     | H <sub>β</sub> -22<br>H <sub>β</sub> -11, H <sub>α</sub> -22                                                                  |
| 23                | 1.61, s                                                                     | 22.1, CH <sub>3</sub>  | 12, 13, 14,<br>17 |                                                                                              | H <sub>α</sub> -11, H <sub>3</sub> -20                                                                                        |
| 24                | 1.32, s                                                                     | 24.1, CH <sub>3</sub>  | 15, 16, 17        |                                                                                              |                                                                                                                               |
| 25                | —                                                                           | 168.0, C               |                   |                                                                                              |                                                                                                                               |
| -OCH <sub>3</sub> | 3.58, s                                                                     | 51.1, CH <sub>3</sub>  | 25                |                                                                                              |                                                                                                                               |

<sup>a</sup>: HMBC correlations are from proton(s) to the indicated carbon.

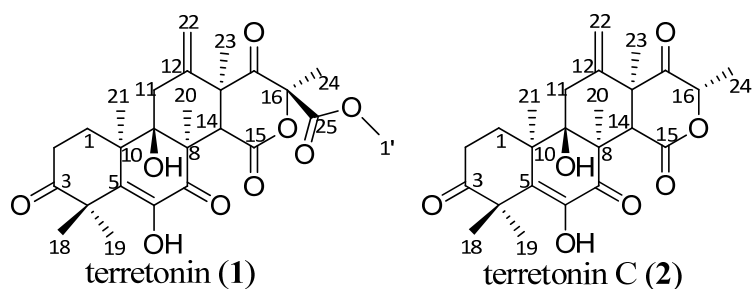

**Table S6.**  $^1\text{H}$  and  $^{13}\text{C}$  NMR data for compound **1** (400 and 100 MHz in  $\text{CDCl}_3$ ), and compound **2** (400 and 100 MHz in  $\text{CDCl}_3$ )

| Position | $\delta\text{H}$ ( $J$ in Hz)          |                                  | $\delta\text{C}$     |                      |
|----------|----------------------------------------|----------------------------------|----------------------|----------------------|
|          | <b>1</b>                               | <b>2</b>                         | <b>1</b>             | <b>2</b>             |
| 1        | 1.76, m<br>2.36, m                     | 1.79, dd (16.4, 8.8)<br>2.39, m  | 32.8, $\text{CH}_2$  | 28.4, $\text{CH}_2$  |
| 2        | 2.71, dd (19.2, 8.4)<br>2.53 m         | 2.55, m<br>2.73, dd (18.8, 8.8)  | 35.1, $\text{CH}_2$  | 32.8, $\text{CH}_2$  |
| 3        |                                        |                                  | 214.5, C             | 214.2, C             |
| 4        |                                        |                                  | 52.5, C              | 48.1, C              |
| 5        |                                        |                                  | 131.8, C             | 132.1, C             |
| 6        |                                        |                                  | 140.0, C             | 138.9, C             |
| 7        |                                        |                                  | 197.2, C             | 197.6, C             |
| 8        |                                        |                                  | 43.3, C              | 52.3, C              |
| 9        |                                        |                                  | 77.8, C              | 78.1, C              |
| 10       |                                        |                                  | 48.1, C              | 43.4, C              |
| 11       | 2.27, br d (14.4)<br>2.97, br d (14.4) | 2.29, d (14.4)<br>3.01, d (14.4) | 28.3, $\text{CH}_2$  | 35.3, $\text{CH}_2$  |
| 12       |                                        |                                  | 138.9, C             | 140.5, C             |
| 13       |                                        |                                  | 49.6, C              | 49.5, C              |
| 14       | 3.54, s                                | 3.83, s                          | 44.8, CH             | 45.2, CH             |
| 15       |                                        |                                  | 168.8, C             | 169.5, C             |
| 16       |                                        | 5.07, q (6.8)                    | 85.7, CH             | 77.7, CH             |
| 17       |                                        |                                  | 201.6, C             | 206.7, C             |
| 18       | 1.21, s                                | 1.49, s                          | 21.4, $\text{CH}_3$  | 21.4, $\text{CH}_3$  |
| 19       | 1.44, s                                | 1.49, s                          | 23.8, $\text{CH}_3$  | 23.8, $\text{CH}_3$  |
| 20       | 1.47, s                                | 1.97, s                          | 21.4, $\text{CH}_3$  | 18.9, $\text{CH}_3$  |
| 21       | 1.47, s                                | 1.23, s                          | 20.0, $\text{CH}_3$  | 20.2, $\text{CH}_3$  |
| 22       | 5.09, br s<br>5.46, br s               | 5.07, br s<br>5.39, br s         | 117.3, $\text{CH}_2$ | 116.8, $\text{CH}_2$ |
| 23       | 1.71, s                                | 1.42, s                          | 18.8, $\text{CH}_3$  | 23.1, $\text{CH}_3$  |
| 24       | 1.93, s                                | 1.50, d (6.4)                    | 23.6, $\text{CH}_3$  | 14.82, $\text{CH}_3$ |
| 25       |                                        |                                  | 168.0, C             |                      |
| 1'       | 3.79, s                                |                                  | 54.0, $\text{CH}_3$  |                      |
| 9-OH     |                                        |                                  |                      |                      |
| 6-OH     |                                        |                                  |                      |                      |

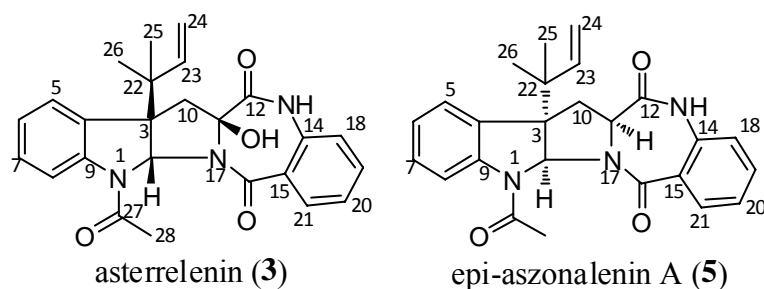

**Table S7.**  $^1\text{H}$  and  $^{13}\text{C}$  NMR data for compound **3** (400 and 100 MHz in  $\text{CD}_3\text{OD}$ ), and compound **5** (400 and 100 MHz in  $\text{DMSO}-d_6$ )

| Position | $\delta\text{H}$ ( $J$ in Hz)                                           |                                                                                    | $\delta\text{C}$     |                      |
|----------|-------------------------------------------------------------------------|------------------------------------------------------------------------------------|----------------------|----------------------|
|          | <b>3</b>                                                                | <b>5</b>                                                                           | <b>3</b>             | <b>5</b>             |
| 1        |                                                                         |                                                                                    | -                    | -                    |
| 2        | 6.34, s                                                                 | 6.05, s                                                                            | 83.4, $\text{CH}_2$  | 81.0, $\text{CH}_2$  |
| 3        |                                                                         |                                                                                    | 59.3, CH             | 50.5, CH             |
| 4        |                                                                         |                                                                                    | 134.2, C             | 133.0, C             |
| 5        | 7.90, dd<br>(8.0, 1.6)                                                  | 7.46, dd<br>(7.6, 1.2)                                                             | 131.7, CH            | 127.3, CH            |
| 6        | 7.11, d (7.6)                                                           | 7.09, dt (7.6, 1.2)                                                                | 125.4, CH            | 123.4, CH            |
| 7        | 7.73, br d (8.0)                                                        | 7.19, dt (7.6, 1.2)                                                                | 134.1, CH            | 127.8, CH            |
| 8        | 7.44, d (7.2)                                                           | 7.66, br d (7.6)                                                                   | 120.3, CH            | 117.9, CH            |
| 9        |                                                                         |                                                                                    | 138.3, C             | 141.6, C             |
| 10       | $\text{H}_\alpha$ : 3.73, d (12.0)<br>$\text{H}_\beta$ : 2.49, d (14.0) | $\text{H}_\alpha$ : 2.99, d (13.2)<br>$\text{H}_\beta$ : 2.56, dd (13.2, 8.8)      | 41.5, $\text{CH}_2$  | 28.9, $\text{CH}_2$  |
| 11       |                                                                         | 4.27, d (8.8)                                                                      | 89.8, C              | 56.7, CH             |
| 12       |                                                                         |                                                                                    | 170.4, C             | 170.7, C             |
| 13       |                                                                         | 10.12, s                                                                           |                      |                      |
| 14       |                                                                         |                                                                                    | 143.1, C             | 137.1, C             |
| 15       |                                                                         |                                                                                    | 126.2, C             | 124.6, C             |
| 16       |                                                                         |                                                                                    | 168.8, C             | 166.3, C             |
| 17       |                                                                         |                                                                                    |                      |                      |
| 18       | 6.93, d (8.4)                                                           | 6.97, d (8.4)                                                                      | 121.2, CH            | 120.9, CH            |
| 19       | 7.24, t (7.6)                                                           | 7.50, dt (8.4, 1.6)                                                                | 129.4, CH            | 132.7, CH            |
| 20       | 7.18, t (8.4)                                                           | 7.20, br t (8.4)                                                                   | 124.7, CH            | 123.6, CH            |
| 21       | 7.41, dd (6.8, 1.6)                                                     | 7.87, dd (8.4, 1.6)                                                                | 128.6, CH            | 130.8, CH            |
| 22       |                                                                         |                                                                                    | 41.8, C              | 40.4, C              |
| 23       | 5.89, dd (17.2, 10.8)                                                   | 5.91, dd (17.2, 10.8)                                                              | 145.0, CH            | 143.9, CH            |
| 24       | $\text{H}_\alpha$ : 5.15, d (18.8)<br>$\text{H}_\beta$ : 5.12, d (11.2) | $\text{H}_\alpha$ : 5.11, dd (17.2, 1.2)<br>$\text{H}_\beta$ : 5.08, d (10.8, 1.2) | 114.8, $\text{CH}_2$ | 114.0, $\text{CH}_2$ |
| 25       | 1.20, s                                                                 | 0.87, s                                                                            | 22.9, $\text{CH}_3$  | 22.8, $\text{CH}_3$  |
| 26       | 0.97, s                                                                 | 1.11, s                                                                            | 23.8, $\text{CH}_3$  | 22.1, $\text{CH}_3$  |
| 27       |                                                                         |                                                                                    | 170.4, C             | 169.6, C             |
| 28       | 2.69, s                                                                 | 2.61, s                                                                            | 24.1, $\text{CH}_3$  | 23.4, $\text{CH}_3$  |



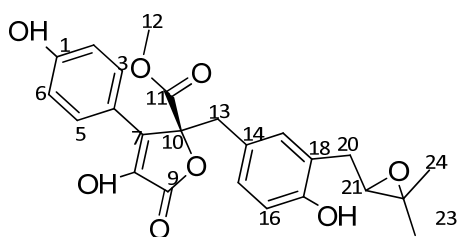

butyrolactone III (**4**)

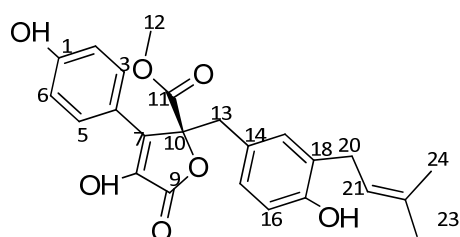

butyrolactone I (**6**)

**Table S8.**  $^1\text{H}$  and  $^{13}\text{C}$  NMR data for compound **4** (400 and 100 MHz in  $\text{CD}_3\text{OD}$ ), and compound **6** (400 and 100 MHz in  $\text{CD}_3\text{OD}$ )

| Position | $\delta\text{H}$ ( $J$ in Hz) |                                  | $\delta\text{C}$    |                     |
|----------|-------------------------------|----------------------------------|---------------------|---------------------|
|          | <b>4</b>                      | <b>6</b>                         | <b>4</b>            | <b>6</b>            |
| 1        |                               |                                  | 157.9, C            | 159.5, C            |
| 2        | 6.87, dd (7.2, 2.0)           | 6.87, d (9.2)                    | 115.8, CH           | 116.8, CH           |
| 3        | 7.55, dd (7.2, 2.0)           | 7.59, d (8.8)                    | 128.8, CH           | 130.5, CH           |
| 4        |                               |                                  | 121.0, C            | 123.3, C            |
| 5        | 7.55, dd (7.2, 2.0)           | 7.59, d (8.8)                    | 128.8, CH           | 130.5, CH           |
| 6        | 6.87, dd (7.2, 2.0)           | 6.87, d (9.2)                    | 115.7, CH           | 116.8, CH           |
| 7        |                               |                                  | 127.6, C            | 129.3, C            |
| 8        |                               |                                  | 138.1, C            | 139.9, C            |
| 9        |                               |                                  | 168.0, C            | 170.5, C            |
| 10       |                               |                                  | 84.7, C             | 86.9, C             |
| 11       |                               |                                  | 169.7, C            | 171.8, C            |
| 12       | 3.79, s                       | 3.78, s                          | 53.5, $\text{CH}_3$ | 54.0, $\text{CH}_3$ |
| 13       | 3.40, s                       | 3.46, d (14.8)<br>3.42, d (14.8) | 38.0, $\text{CH}_2$ | 39.8, $\text{CH}_2$ |
| 14       |                               |                                  | 119.6, C            | 125.2, C            |
| 15       | 6.52, dd (8.0, 2.0)           | 6.54, dd (8.0, 1.6)              | 128.8, C            | 129.9, C            |
| 16       | 6.50, d (8.0)                 | 6.49, d (8.0)                    | 116.8, CH           | 115.2, CH           |
| 17       |                               |                                  | 151.7, C            | 155.3, C            |
| 18       |                               |                                  | 124.3, C            | 128.6, C            |
| 19       | 6.46, br s                    | 6.41, d (2.1)                    | 131.6, CH           | 132.5, CH           |
| 20       |                               | 3.07, d (6.8)                    | 31.0, $\text{CH}_2$ | 28.8 $\text{CH}_2$  |
| 21       | 3.66, td (7.6, 2.0)           | 5.06, td (6.4, 1.2)              | 67.9, CH            | 123.7, CH           |
| 22       |                               |                                  | 77.0, C             | 133.1, C            |
| 23       | 1.17, s                       | 1.67, s                          | 25.7, $\text{CH}_3$ | 26.1, $\text{CH}_3$ |
| 24       | 1.26, s                       | 1.58, s                          | 20.1, $\text{CH}_3$ | 17.9, $\text{CH}_3$ |

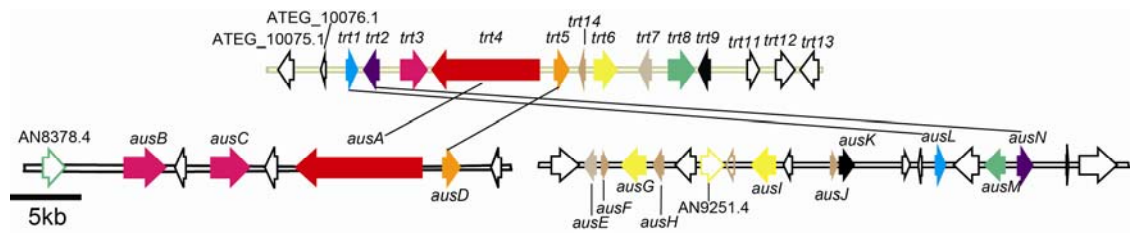

**Figure S1.** Comparison of the *trt* cluster and the *aus* clusters. Filled arrows represent genes that are involved in either terretonin or austinol biosynthesis. Genes in open arrows are not involved. Orthologous genes identified by homology BLAST analysis of their putative protein sequence are shown in the same color (except black). Conserved genes within the *trt* cluster and *aus* clusters are connected.

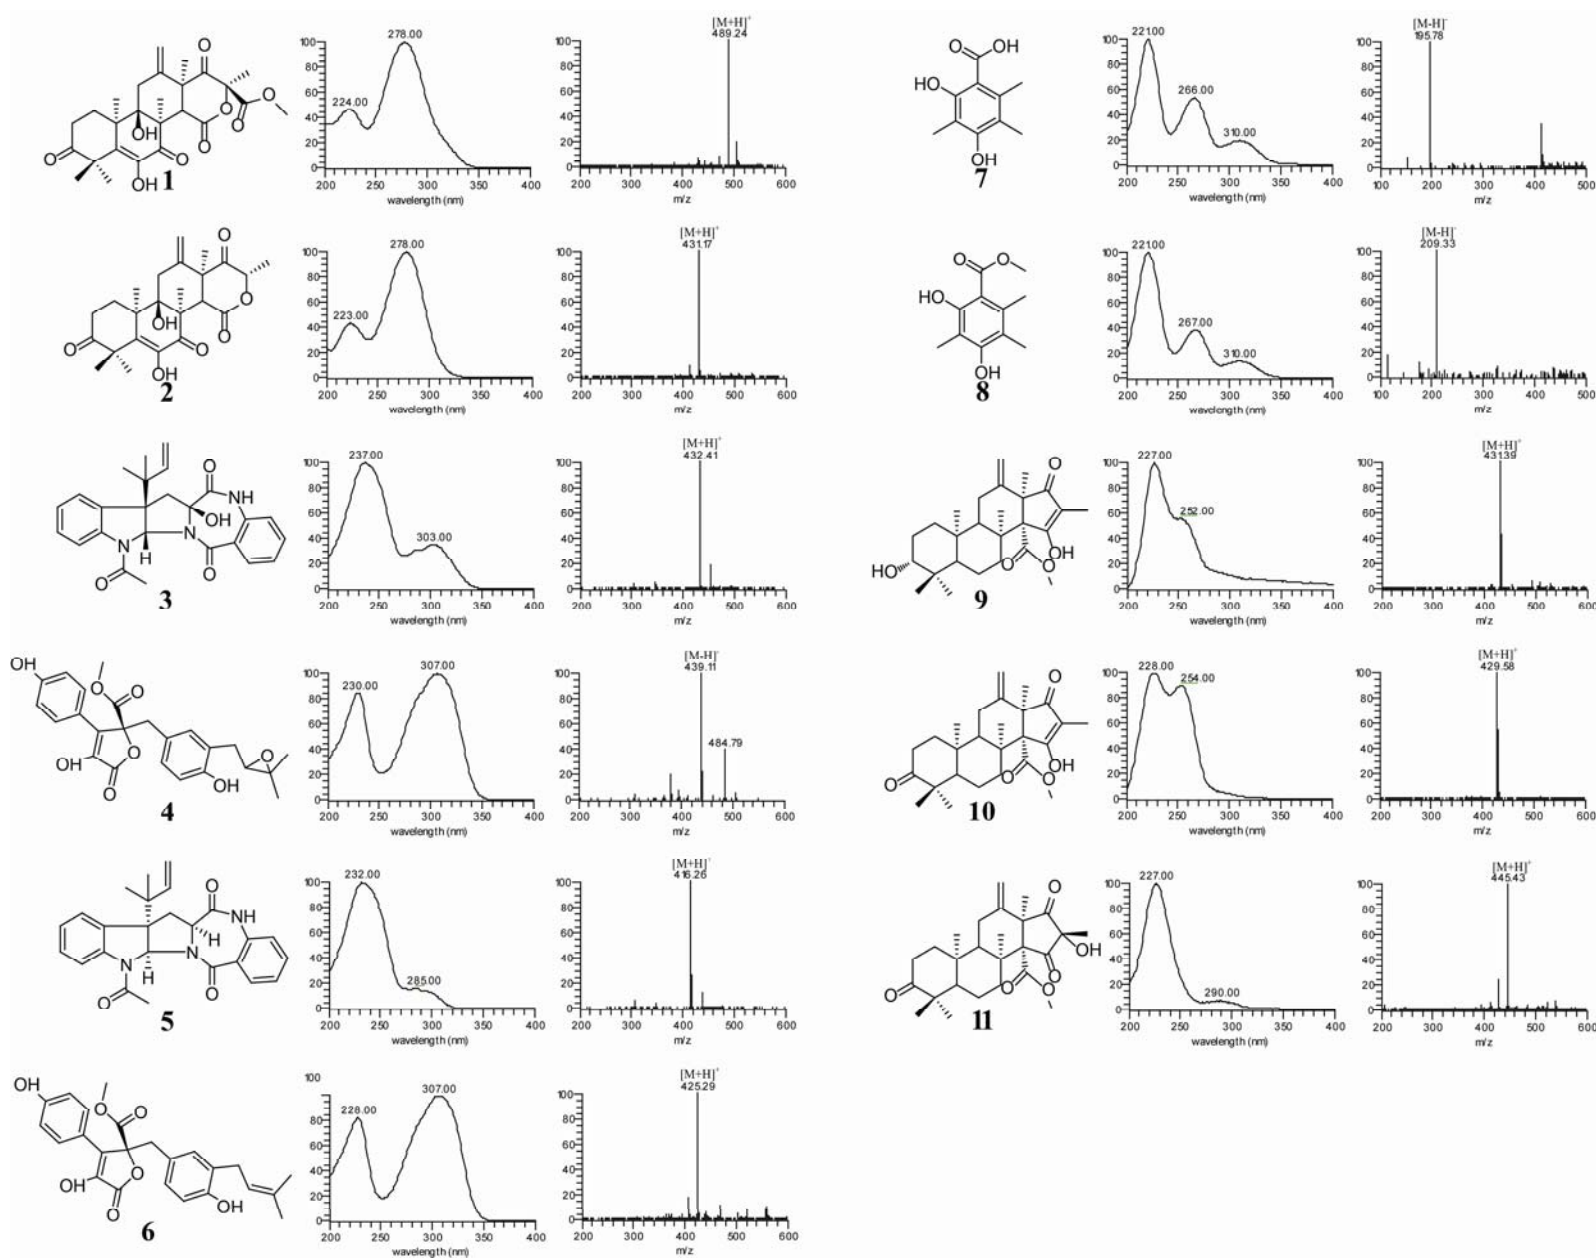

**Figure S2.** UV-Vis and ESIMS spectra of compounds isolated in this study

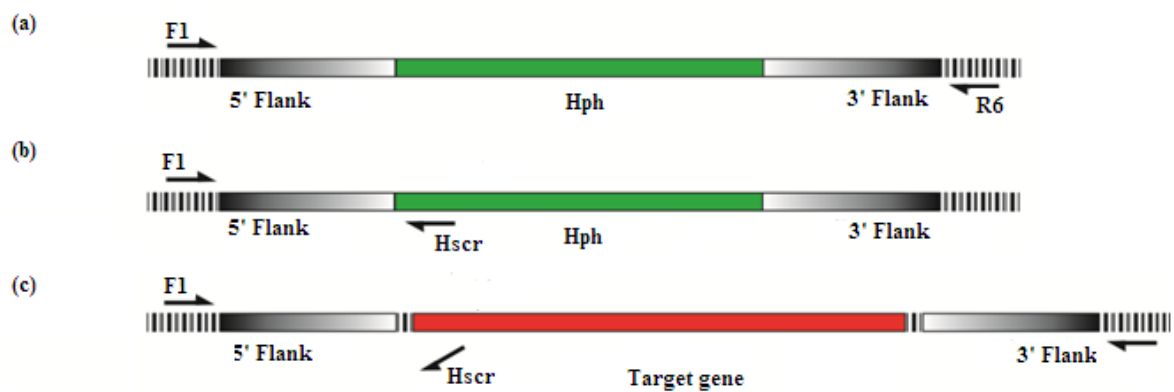

**Figure S3.** Schematic of the diagnostic PCR screening strategy. Two primer pairs are used for confirming homologous integration of the knockout construct at the target locus. Primers F1 and R6 anneal beyond the 5' and 3' flanks of the transforming DNA construct, respectively, and Hscr anneals within the *Hph* gene. In the knockout strain primers F1 and R6 amplify a fragment of approximately 3 kb (a) while primers F1 and Hscr produce a fragment of approximately 1 kb (b). If the target gene has not been replaced, primer Hscr will not anneal and there will be no specific amplification (c).

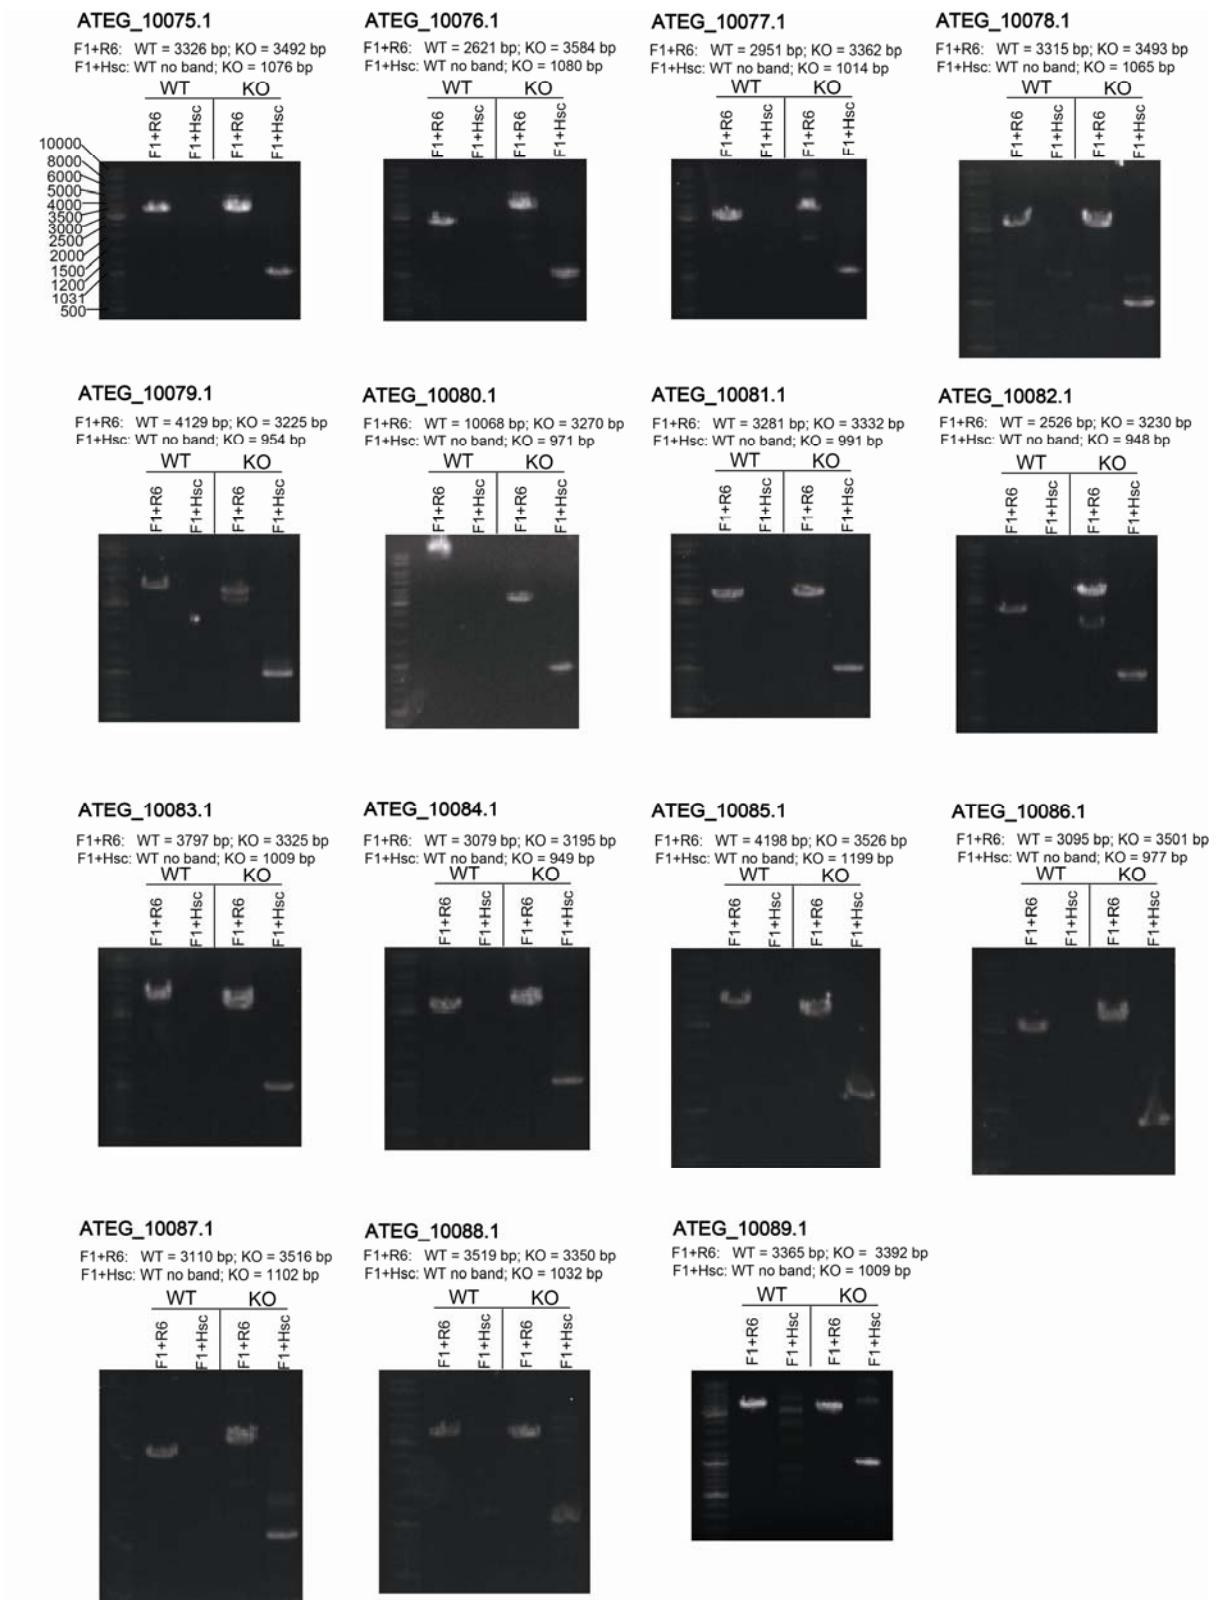

**Figure S4.** Diagnostic PCR for the gene deletant strains.

**Figures S5-S14.** Total genomic DNA was isolated from wild type and mutant strains and one microgram from each strain was digested with the restriction enzymes specified in each figure. Digests were electrophoresed on 1% agarose gels and blotted using standard methods. Biotin labeled DNA probes were generated from PCR products amplified using primers F1 and R6 specific to each locus.

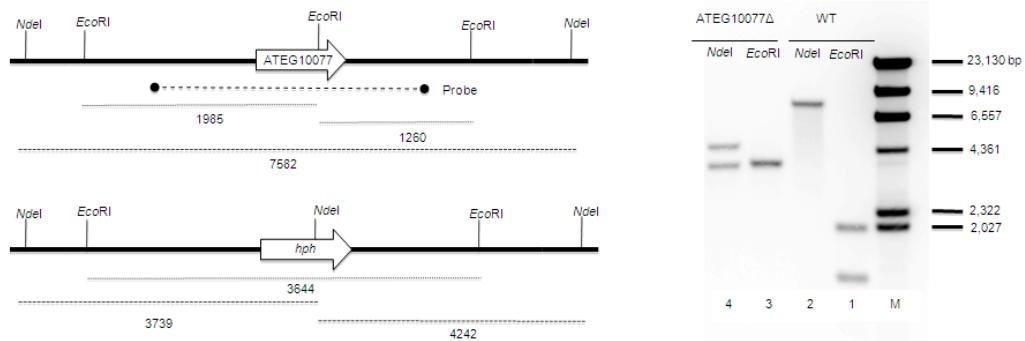

**Figure S5.** Southern blot confirming gene deletion of ATEG\_10077.1. Replacement of the target gene with the hygromycin resistance marker removed an *EcoRI* site causing the 1985 bp and 1260 bp wild-type bands (lane 1) to become a single 3644bp band (lane 3) in the mutant strain.

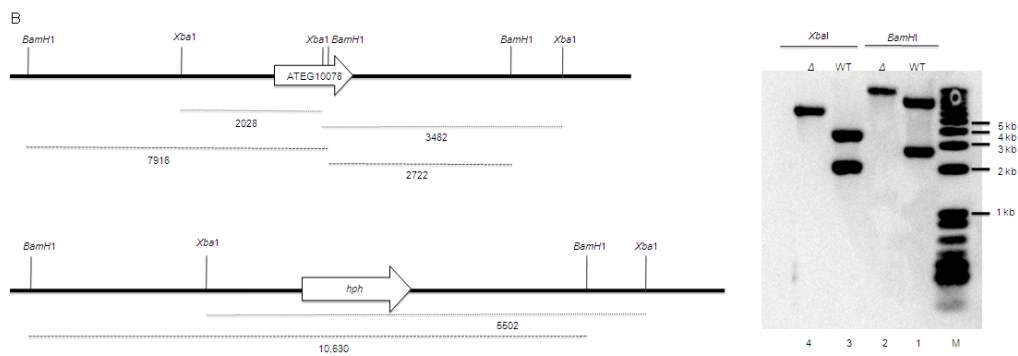

**Figure S6.** Southern blot confirming gene deletion of ATEG\_10078.1. Replacement of the target gene with the hygromycin resistance marker removed a *BamHI* site causing the 7916 bp and 2722 bp wild-type bands (lane 1) to become a single 10,630 bp band (lane 2) in the mutant strain.

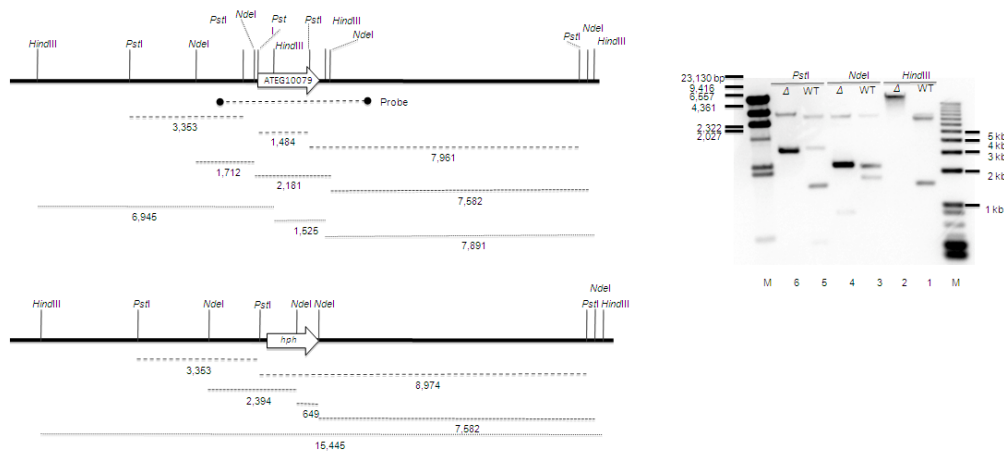

**Figure S7.** Southern blot confirming gene deletion of ATEG\_10079.1. Replacement of the target gene with the hygromycin resistance marker removed two *HindIII* sites causing the 6945 bp, 1525 bp, and 7891 bp wild-type bands (lane 1) to become a single 15,445 bp band (lane 2) in the mutant strain.

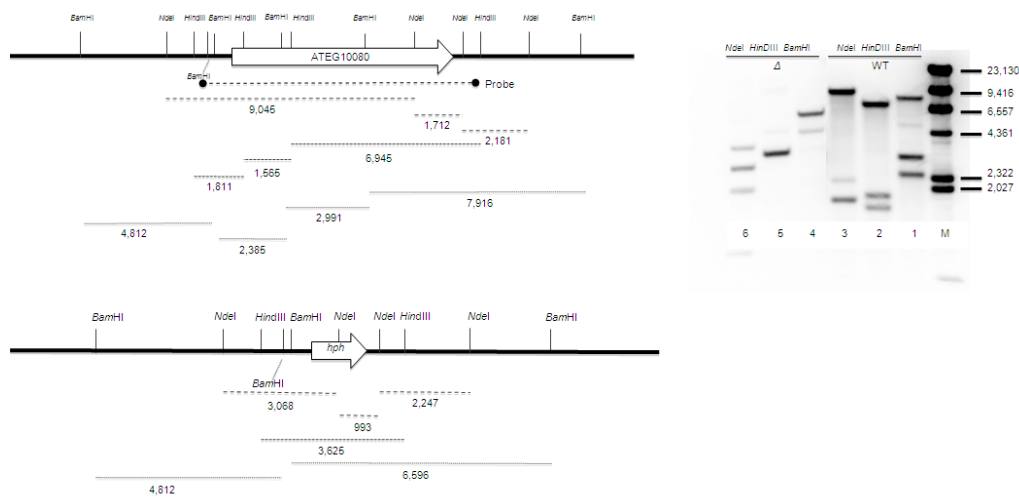

**Figure S8.** Southern blot confirming gene deletion of ATEG\_10080.1. Replacement of the target gene with the hygromycin resistance marker removed two *HindIII* sites causing the 1811 bp, 1565 bp, and 6945 bp wild-type bands (lane 2) to become a single 3625 bp band (lane 5) in the mutant strain.

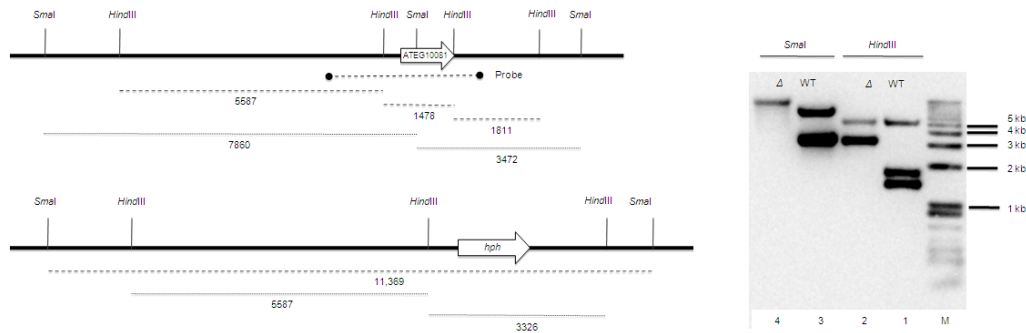

**Figure S9.** Southern blot confirming gene deletion of ATEG\_10081.1. Replacement of the target gene with the hygromycin resistance marker removed a *SmaI* site causing the 7860 bp and 3472 bp wild-type bands (lane 3) to become a single 11,369 bp band (lane 4) in the mutant strain.

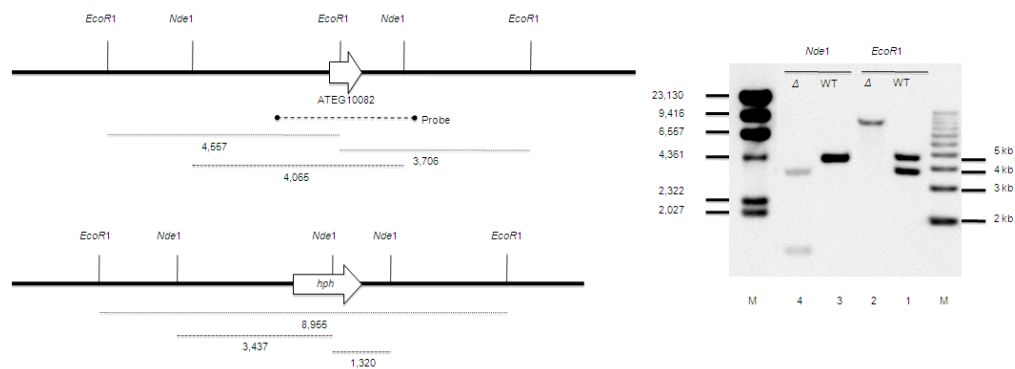

**Figure S10.** Southern blot confirming gene deletion of ATEG\_10082.1. Replacement of the target gene with the hygromycin resistance marker removed an *EcoRI* site causing the 4557 bp and 3706 bp wild-type bands (lane 1) to become a single 8955 bp band (lane 2) in the mutant strain.

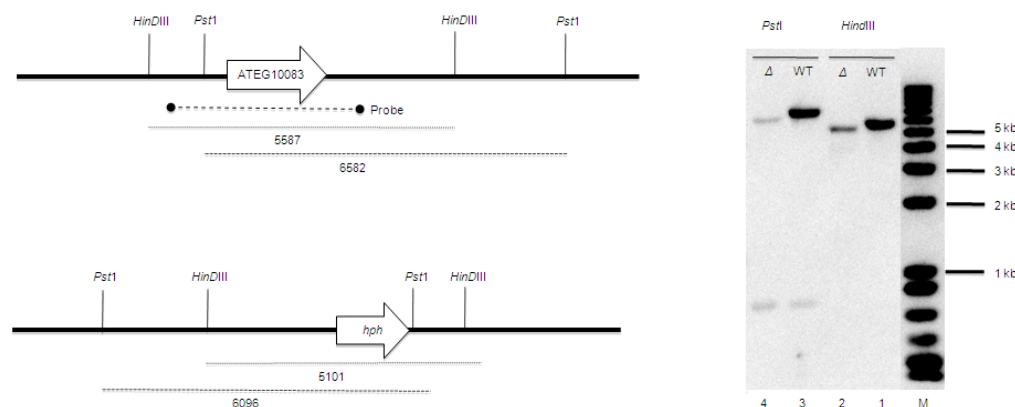

**Figure S11.** Southern blot confirming gene deletion of ATEG\_10083.1. Replacement of the target gene with the smaller hygromycin resistance marker reduced the distance between two *HindIII* sites by 486 bp causing the 5587 bp wild-type band (lane 1) to become a 5101 bp band (lane 2) in the mutant strain.



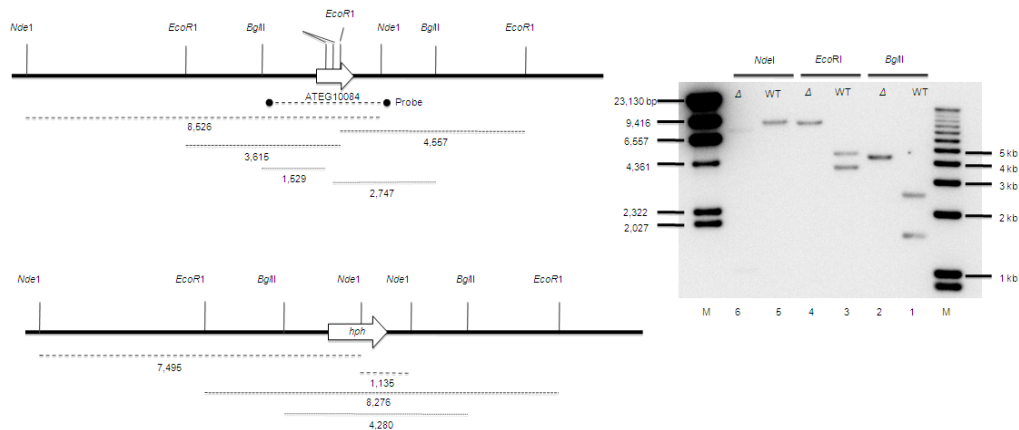

**Figure S12.** Southern blot confirming gene deletion of ATEG\_10084.1. Replacement of the target gene with the hygromycin resistance marker removed two closely spaced *BglIII* sites causing the 1529 bp and 2747 bp wild-type bands (lane 1) to become a single 4280 bp band (lane 2) in the mutant strain.

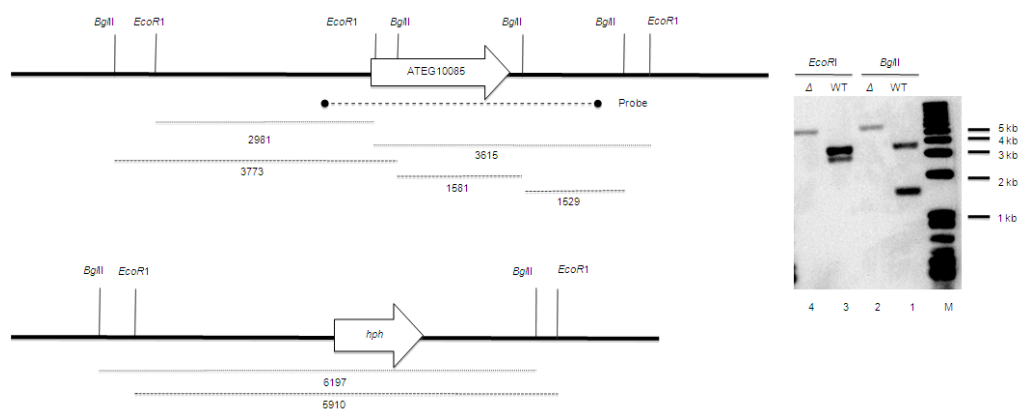

**Figure S13.** Southern blot confirming gene deletion of ATEG\_10085.1. Replacement of the target gene with the hygromycin resistance marker removed two *BglIII* sites causing the 3733 bp, and overlapping 1581 bp and 1529 bp wild-type bands (lane 1) to become a single 5910 bp band (lane 2) in the mutant strain.

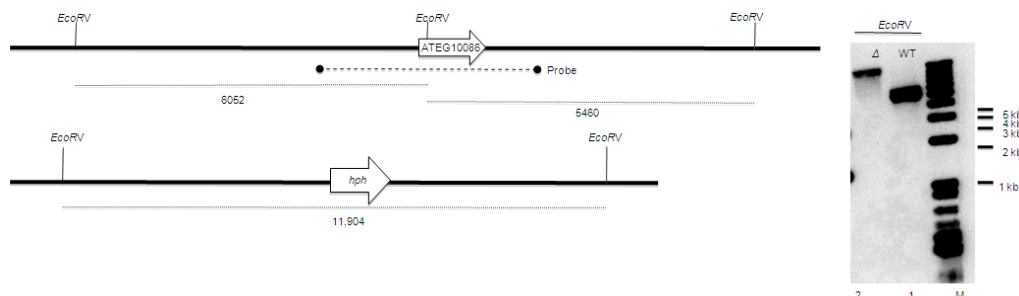

**Figure S14.** Southern blot confirming gene deletion of ATEG\_10086.1. Replacement of the target gene with the hygromycin resistance marker removed an *EcoRV* site causing the 6052 bp and 5460 bp wild-type bands (lane 1) to become a single 11,904 bp band (lane 2) in the mutant strain.

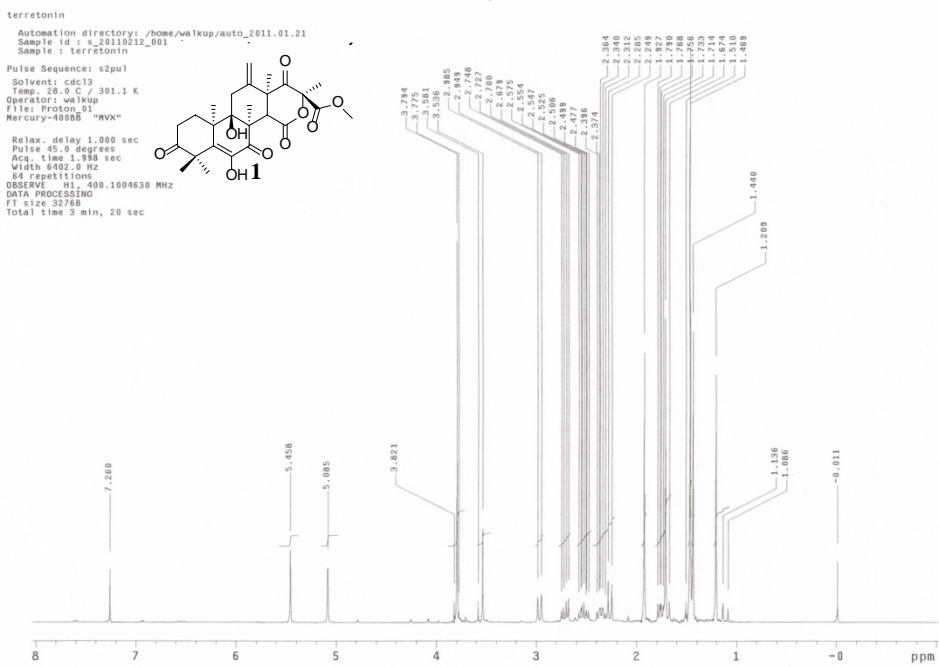

a.  $^1\text{H}$  NMR spectrum of compound 1

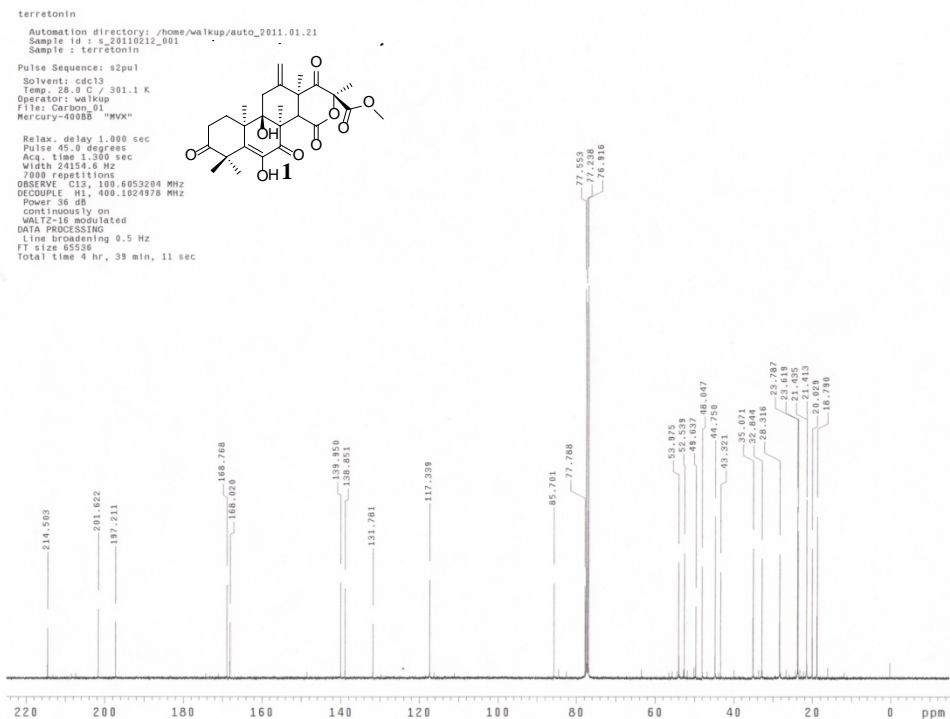

b.  $^{13}\text{C}$  NMR spectrum of compound 1  
**Figure S15.**  $^1\text{H}$  and  $^{13}\text{C}$  NMR spectrum of compound 1

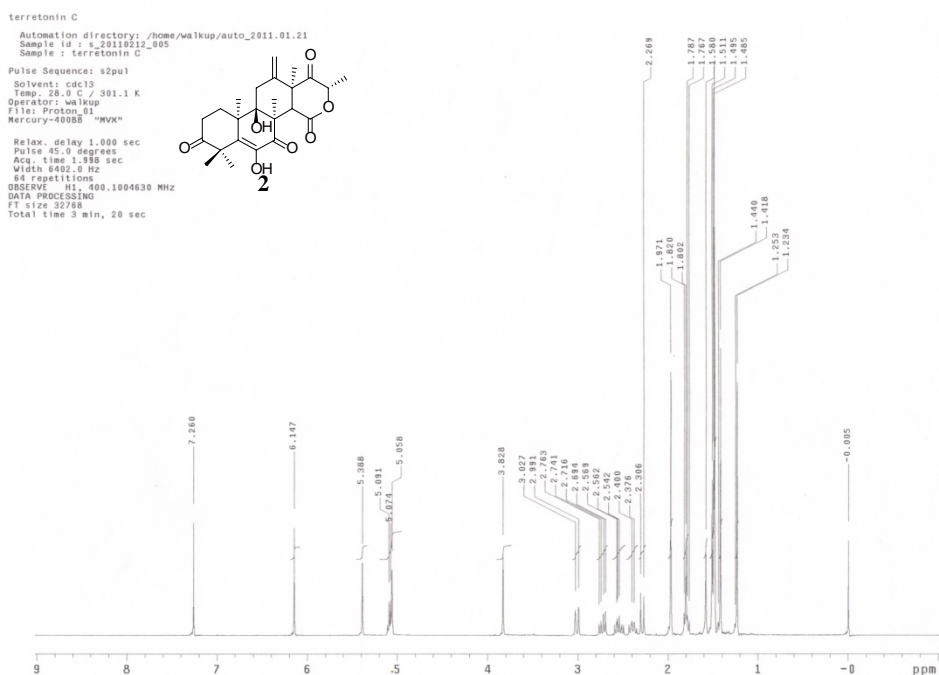

a.  $^1\text{H}$  NMR spectrum of compound 2

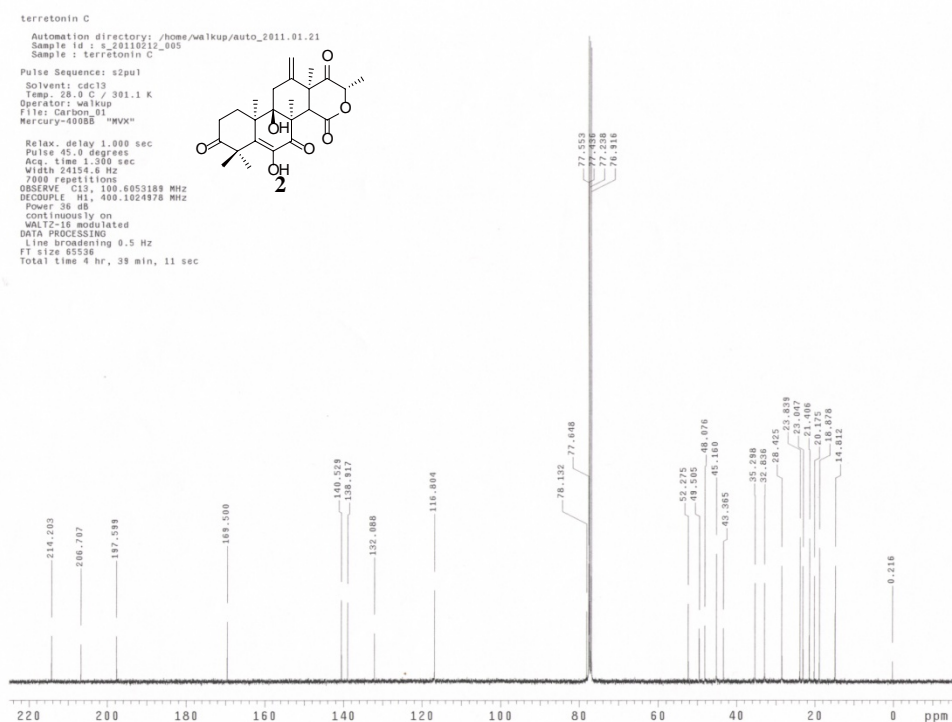

b.  $^{13}\text{C}$  NMR spectrum of compound 2  
**Figure S16.**  $^1\text{H}$  and  $^{13}\text{C}$  NMR spectra of compound 2

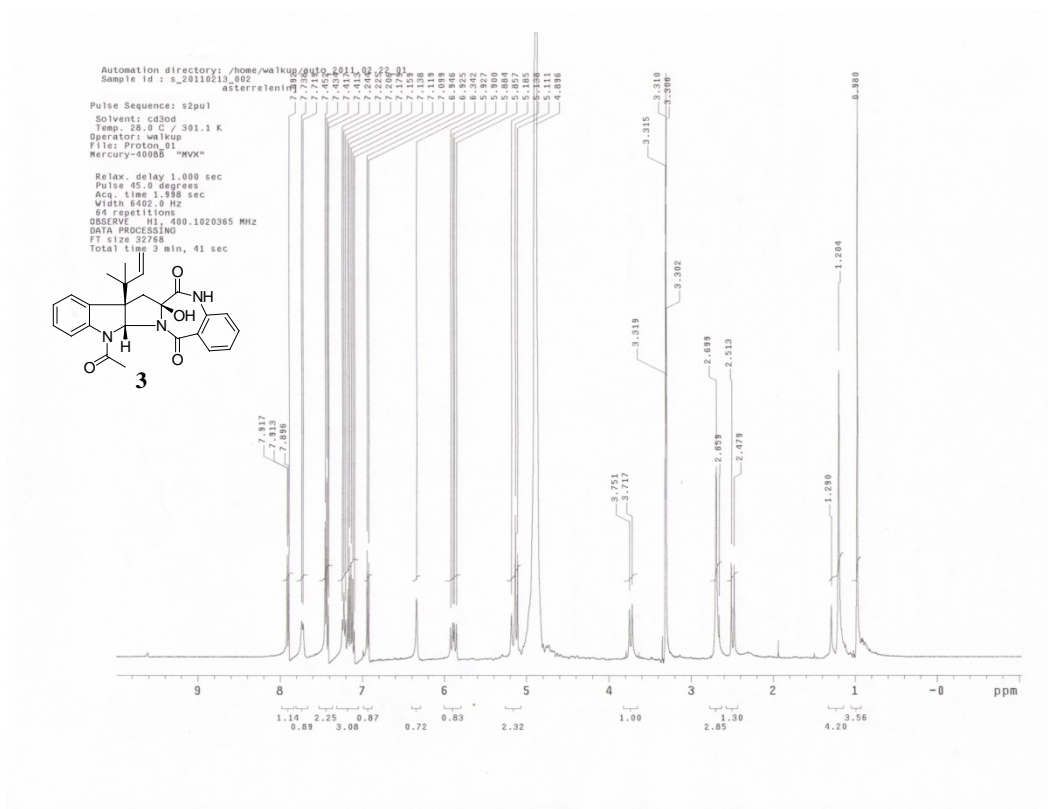

a.  $^1\text{H}$  NMR spectrum of compound 3

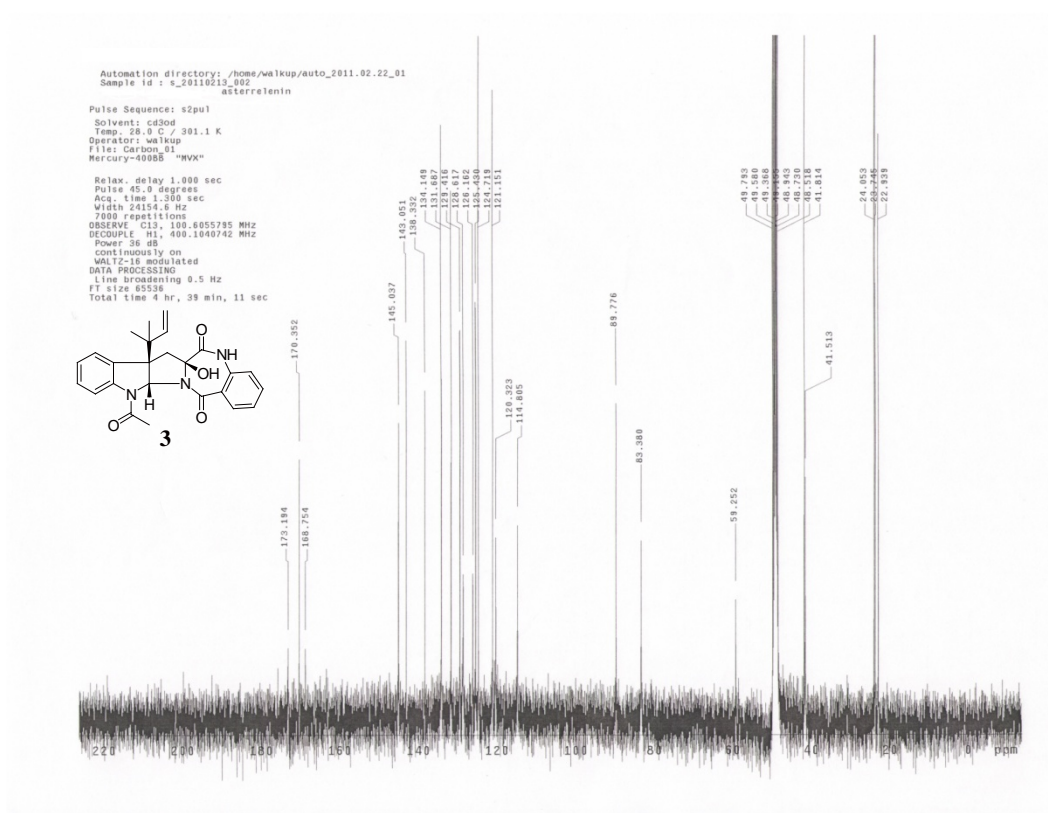

b.  $^{13}\text{C}$  NMR spectrum of compound 3

**Figure S17.**  $^1\text{H}$  and  $^{13}\text{C}$  NMR spectra of compound 3



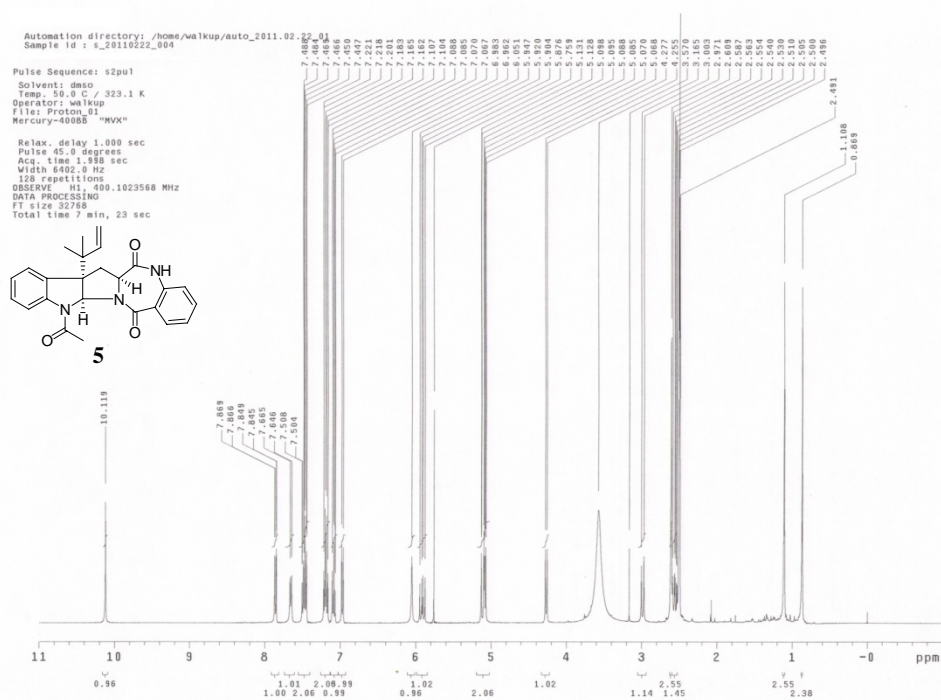

a.  $^1\text{H}$  NMR spectrum of compound **5**

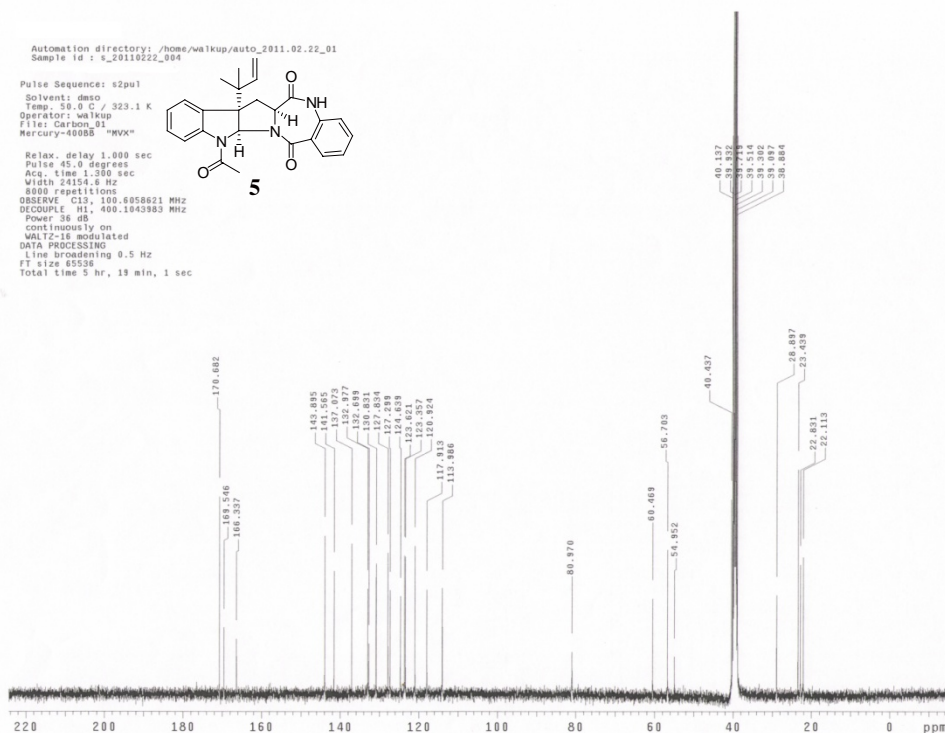

b.  $^{13}\text{C}$  NMR spectrum of compound **5**

**Figure S19.**  $^1\text{H}$  and  $^{13}\text{C}$  NMR spectra of compound **5**

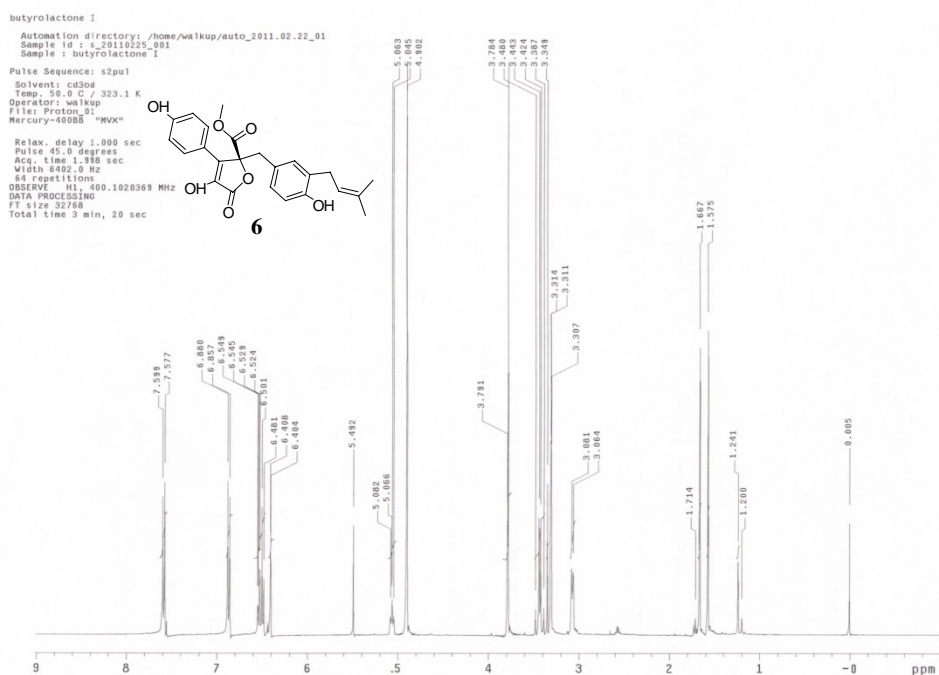

a.  $^1\text{H}$  NMR spectrum of compound **6**

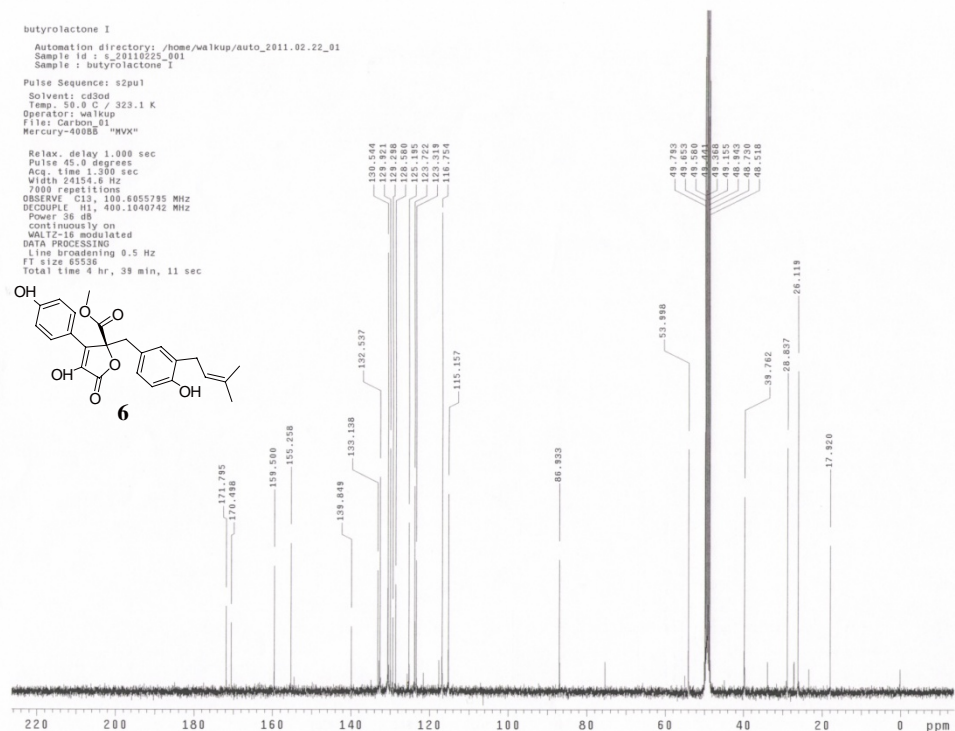

b.  $^{13}\text{C}$  NMR spectrum of compound **6**  
**Figure S20.**  $^1\text{H}$  and  $^{13}\text{C}$  NMR spectra of compound **6**

Automation directory: /home/walkup/auto\_2011.07.19  
 Sample id : s\_20110811\_091  
 Sample : KB81.5\_intermediate  
 Pulse Sequence: s2pul  
 Solvent: acetone  
 Temp: 50.0 C / 323.1 K  
 Operator: walkup  
 File: Proton\_81  
 Mercury-400BB "MVX"  
 Relax. delay 1.000 sec  
 Pulse 45.0 degrees  
 Acq. time 1.950 sec  
 Width 6402.0 Hz  
 64 repetitions  
 OBSERVE H1 400.1025355 MHz  
 DATA PROCESSING  
 FT size 52768  
 Total time 3 min, 20 sec

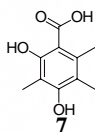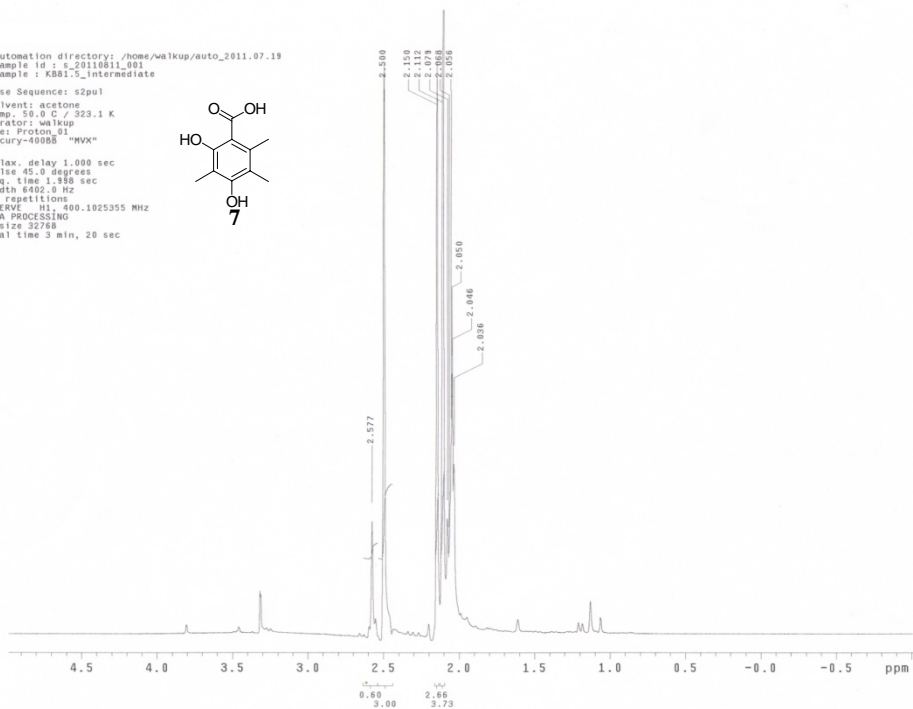

Figure S21. <sup>1</sup>H NMR spectrum of compound 7

Automation directory: /home/walkup/auto\_2011.07.19  
 Sample id : s\_20110207\_009  
 Sample : KB8E-1FB(1)  
 Pulse Sequence: s2pul  
 Pulse Sequence: s2pul  
 Solvent: cd3od  
 Temp: 28.0 C / 301.1 K  
 Operator: walkup  
 File: Proton\_Minsw\_92  
 Mercury-400BB "MVX"  
 Relax. delay 1.000 sec  
 Pulse 45.0 degrees  
 Acq. time 1.998 sec  
 Width 2013.4 Hz  
 64 repetitions  
 OBSERVE H1 400.1020570 MHz  
 DATA PROCESSING  
 FT size 5192  
 Total time 3 min, 16 sec

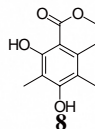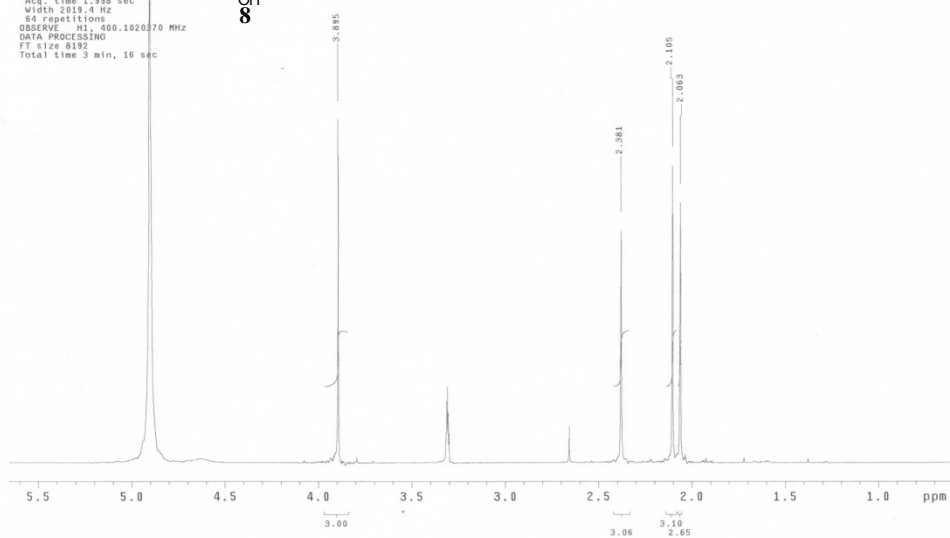

Figure S22. <sup>1</sup>H NMR spectrum of compound 8



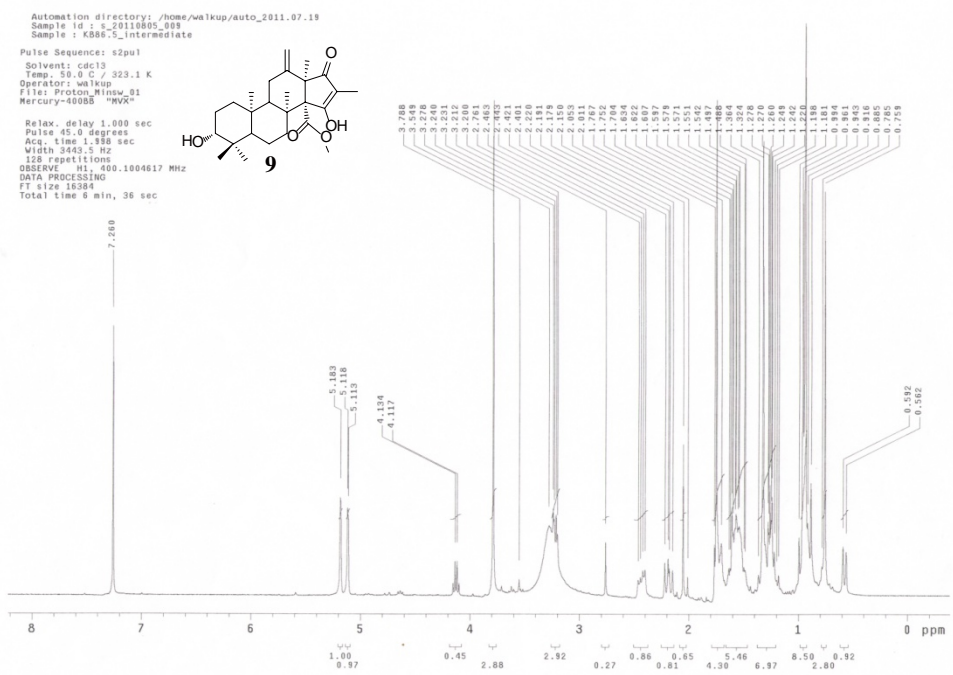

a. <sup>1</sup>H NMR spectrum of compound 9

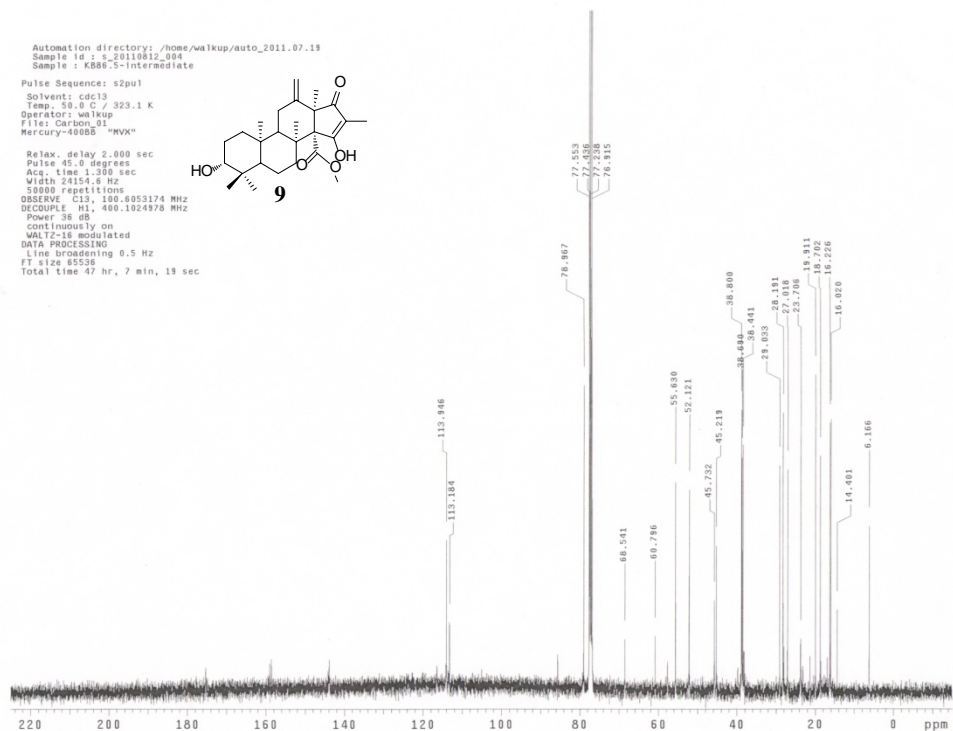

b. <sup>13</sup>C NMR spectrum of compound 9  
 Figure S23. <sup>1</sup>H and <sup>13</sup>C NMR spectra of compound 9

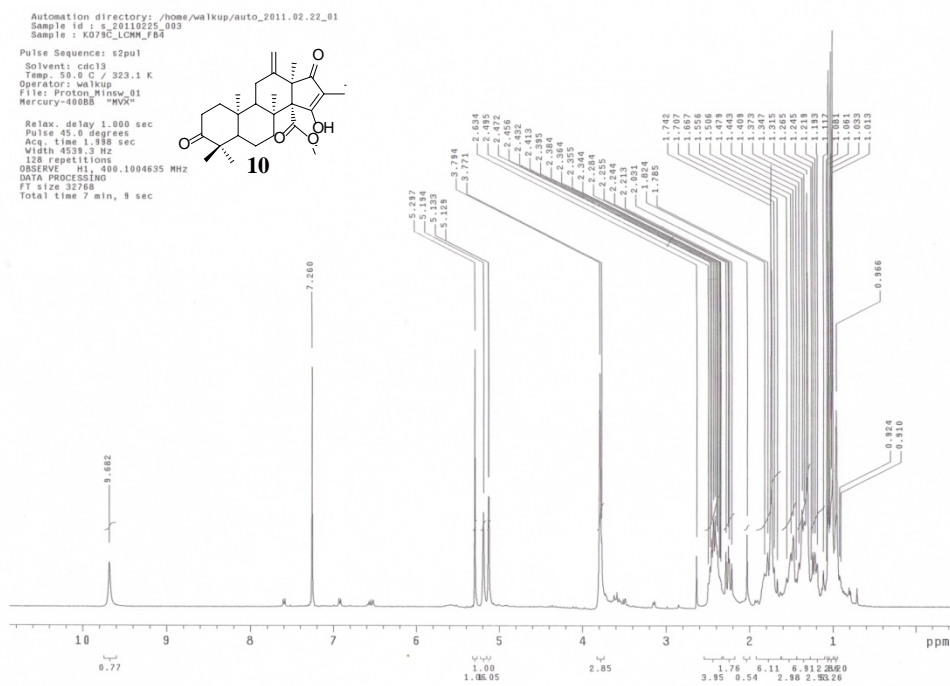

a. <sup>1</sup>H NMR spectrum of compound **10**

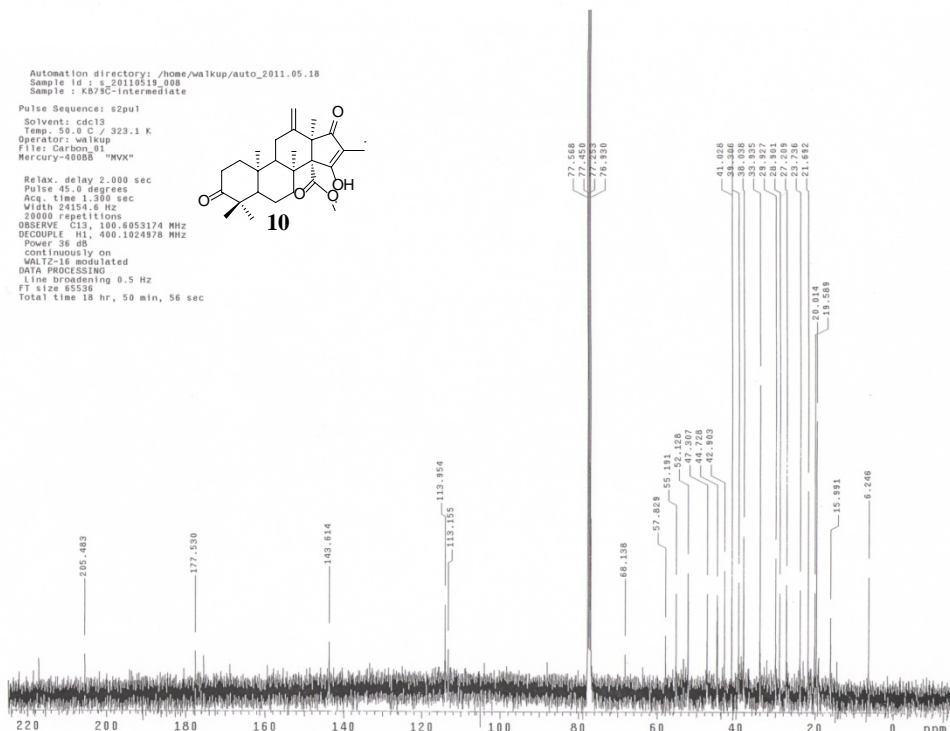

b. <sup>13</sup>C NMR spectrum of compound **10**

**Figure S24.** <sup>1</sup>H and <sup>13</sup>C NMR spectra of compound **10**

KB79C\_LCHM\_FB4

Automation directory: /home/walkup/auto\_2012.09.28  
Sample id : s\_20110226\_003  
Sample : K079C\_LCHM\_FB4

Pulse Sequence: gHMQC  
Solvent: cdc13  
Temp. 50.0 C / 323.1 K  
Operator: walkup  
File: Ghmqc\_01  
Mercury-400BB "MVX"

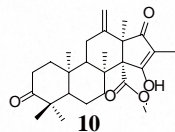

Relax. delay 1.000 sec  
Acq. time 0.128 sec  
Width 4539.3 Hz  
2D Width 17101.3 Hz  
128 repetitions  
2 x 128 increments  
OBSERVE H1, 400.1004631 MHz  
DECOUPLE C13, 100.6128628 MHz  
Power 45 dB  
on during acquisition  
off during delay  
GARP-1 modulated  
DATA PROCESSING  
Gauss apodization 0.059 sec  
F1 DATA PROCESSING  
Gauss apodization 0.007 sec  
FT size 2048 x 2048  
Total time 11 hr, 4 min, 22 sec

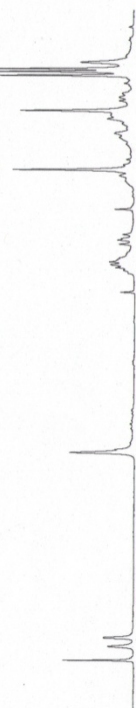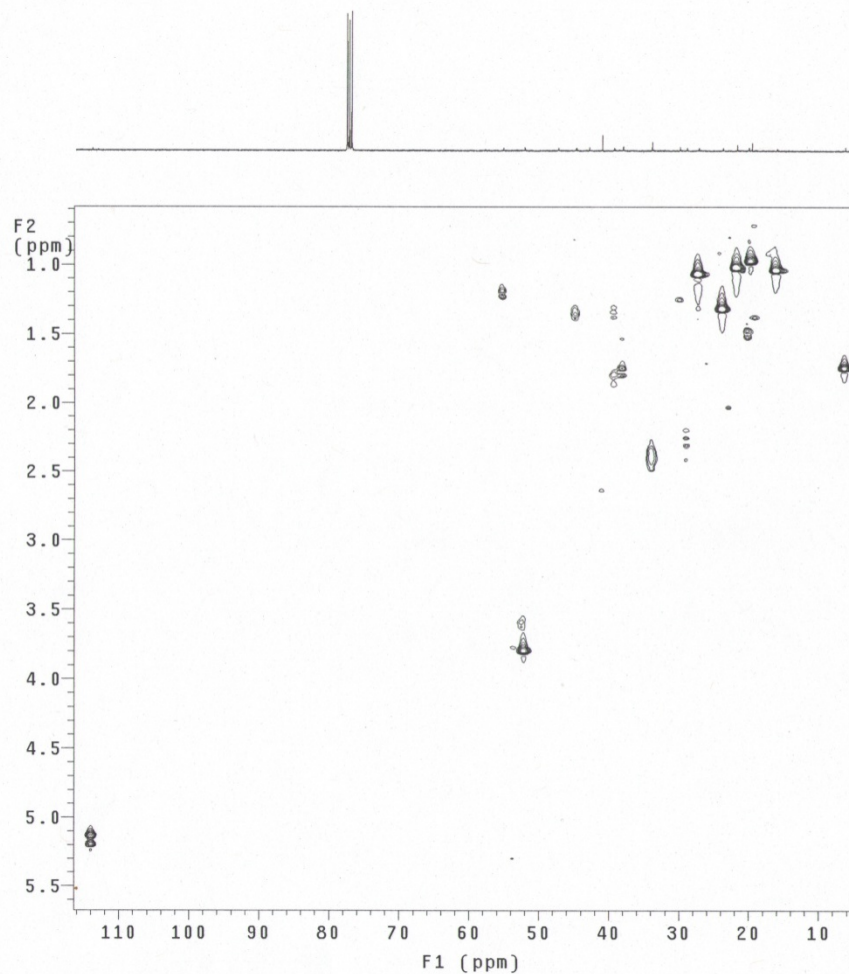

Figure S25. HMQC NMR spectrum of compound **10**

KB79C-intermediate

Automation directory: /home/walkup/auto\_2012.09.28  
Sample id : s\_20110823\_003  
Sample : KB79C-intermediate

Pulse Sequence: gHMBC  
Solvent: cdc13  
Temp. 50.0 C / 323.1 K  
Operator: walkup  
File: Ghmbc\_01  
Mercury-400BB "MVX"

Relax. delay 1.500 sec  
Mixing 0.080 sec  
Acq. time 0.128 sec  
Width 4478.3 Hz  
2D Width 24147.3 Hz  
192 repetitions  
200 increments  
OBSERVE H1, 400.1004631 MHz  
DATA PROCESSING  
Sine bell 0.064 sec  
F1 DATA PROCESSING  
Sine bell 0.008 sec  
FT size 2048 x 2048  
Total time 18 hr, 38 min, 30 sec

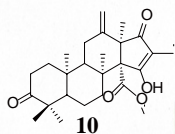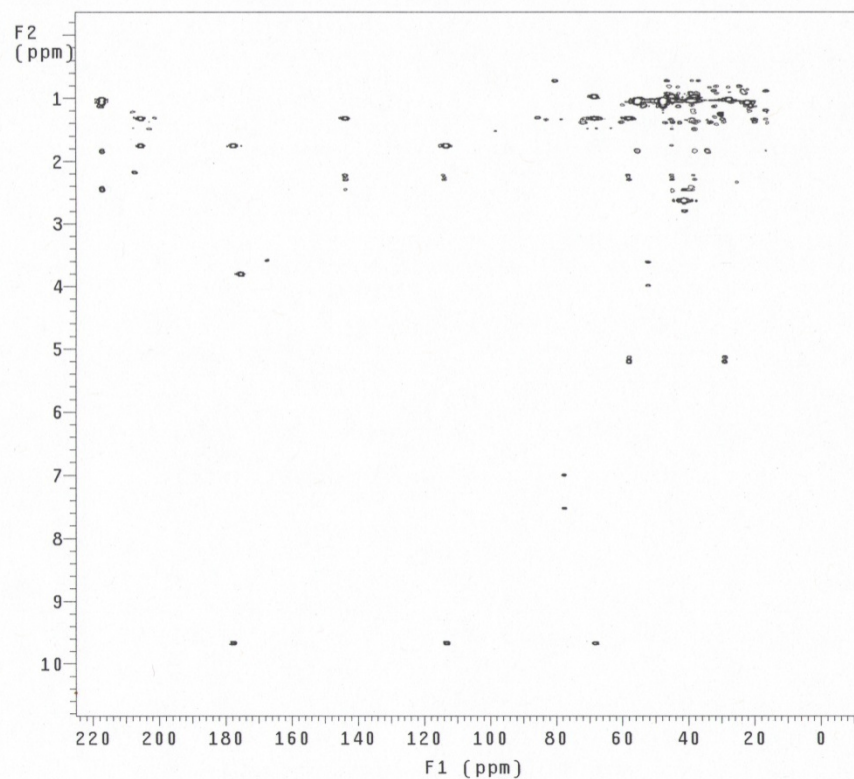

Figure S26. HMBC spectrum of compound 10

KB79C\_LCMM\_FB4

Automation directory: /home/walkup/auto\_2012.09.28  
Sample id : s\_20110226\_003  
Sample : K079C\_LCMM\_FB4

Pulse Sequence: gCOSY  
Solvent: cdc13  
Temp: 50.0 C / 323.1 K  
Operator: walkup  
File: Cosy\_01  
Mercury-400BB "MVX"

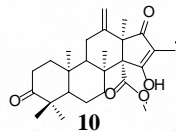

Relax. delay 1.301 sec  
Mixing 0.080 sec  
Acq. time 0.226 sec  
Width 4539.3 Hz  
2D Width 4539.3 Hz  
64 repetitions  
128 increments  
OBSERVE H1, 400.1004631 MHz  
DATA PROCESSING  
Sine bell 0.113 sec  
F1 DATA PROCESSING  
Sine bell 0.056 sec  
FT size 2048 x 2048  
Total time 3 hr, 37 min, 8 sec

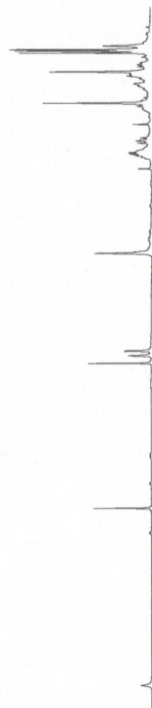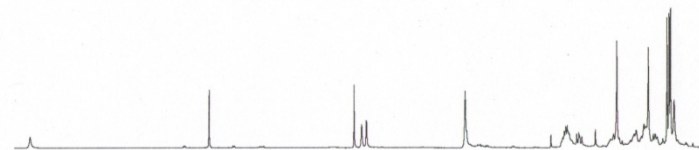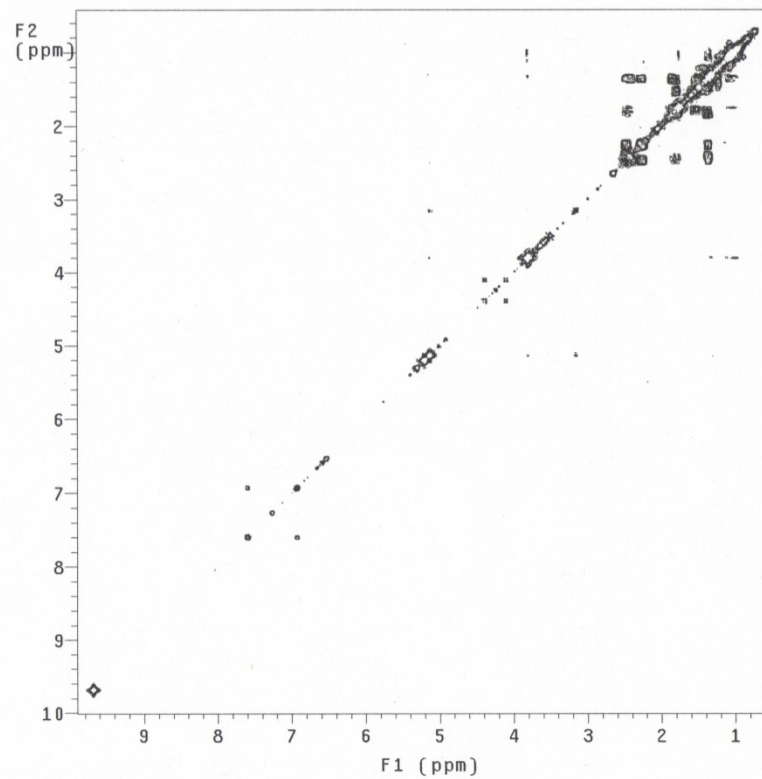

Figure S27. COSY spectrum of compound 10

KB79C\_LCMM\_FB4

Automation directory: /home/walkup/auto\_2012.09.28  
Sample id : s\_20110226\_003  
Sample : KB79C\_LCMM\_FB4

Pulse Sequence: NOESY

Solvent: cdc13  
Temp. 50.0 C / 323.1 K  
Operator: walkup  
File: Noesy\_01  
Mercury-400BB "MVX"

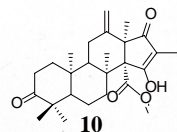

Relax. delay 1.000 sec  
Mixing 0.300 sec  
Acq. time 0.226 sec  
Width 4539.3 Hz  
2D Width 4539.3 Hz  
64 repetitions  
2 x 128 increments  
OBSERVE H1, 400.1004631 MHz  
DATA PROCESSING  
Gauss apodization 0.104 sec  
F1 DATA PROCESSING  
Gauss apodization 0.052 sec  
FT size 2048 x 2048  
Total time 7 hr, 15 min, 18 sec

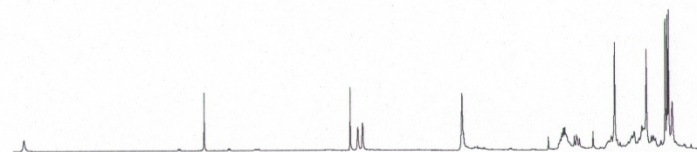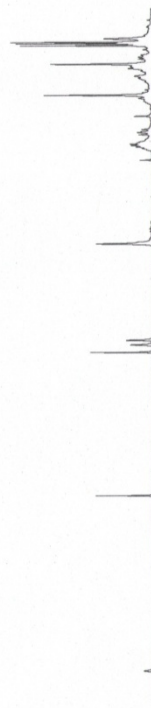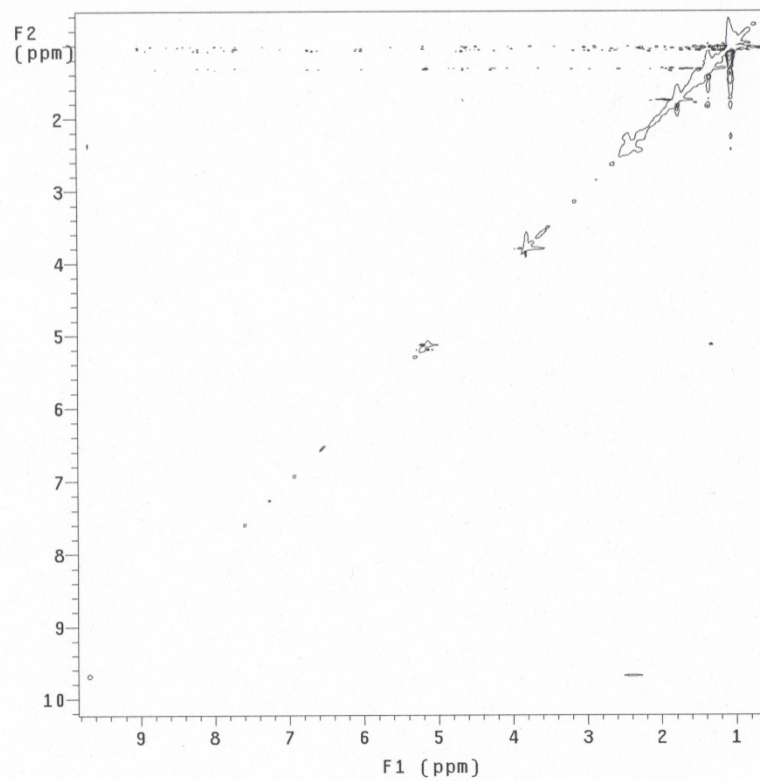

**Figure S28.** NOESY spectrum of compound **10**



KB83CFB3

Automation directory: /home/walkup/auto\_2012.09.28  
Sample id : s\_20110514\_001  
Sample : KB83CFB3

Pulse Sequence: gHMOC

Solvent: cd3od  
Temp. 50.0 C / 323.1 K  
Operator: walkup  
File: Ghmqc\_01  
Mercury-400BB "MVX"

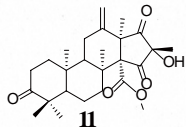

Relax. delay 1.000 sec  
Acq. time 0.128 sec  
Width 2636.4 Hz  
2D Width 17101.3 Hz  
128 repetitions  
2 x 128 increments  
OBSERVE H1, 400.1020395 MHz  
DECOUPLE C13, 100.6132593 MHz  
Power 45 dB  
on during acquisition  
off during delay  
GARP-1 modulated  
DATA PROCESSING  
Gauss apodization 0.059 sec  
F1 DATA PROCESSING  
Gauss apodization 0.007 sec  
FT size 1024 x 2048  
Total time 11 hr, 3 min, 46 sec

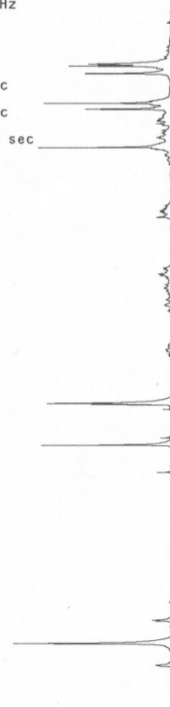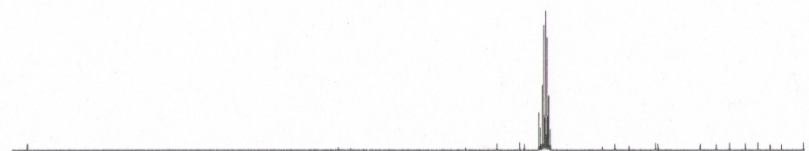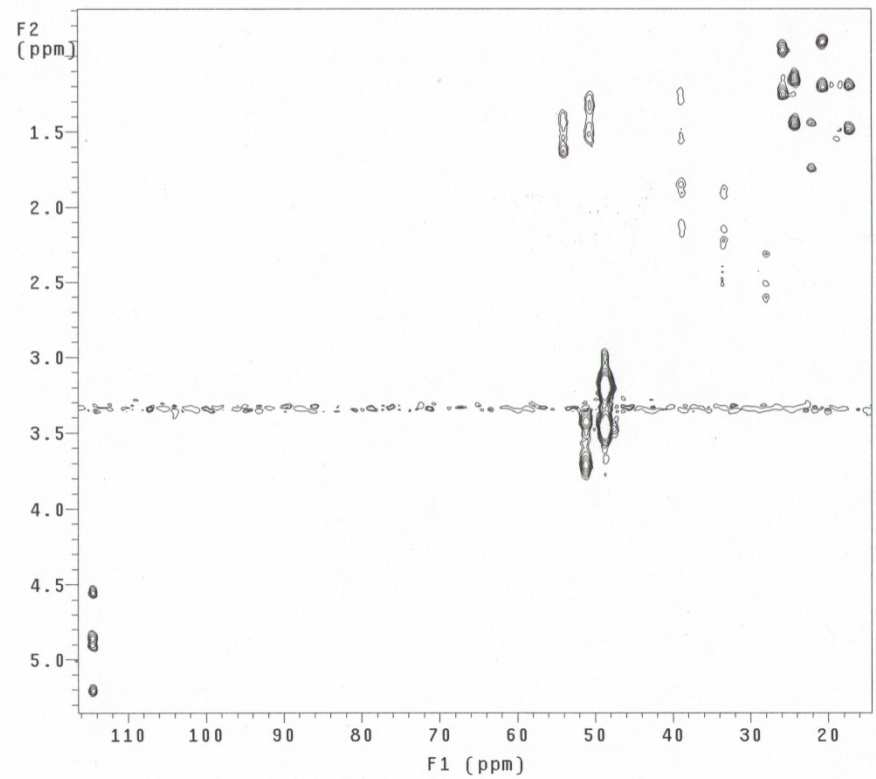

Figure S30. HMQC spectrum of compound 11



KB83CFB3

Automation directory: /home/walkup/auto\_2012.09.28  
Sample id : s\_20110514\_001  
Sample : KB83CFB3

Pulse Sequence: gHMBC

Solvent: cd3od  
Temp: 50.0 C / 323.1 K  
Operator: walkup  
File: Ghmbc\_01  
Mercury-400BB "MVX"

Relax. delay 1.500 sec  
Mixing 0.080 sec  
Acq. time 0.128 sec  
Width 2636.4 Hz  
2D Width 24147.3 Hz  
128 repetitions  
200 increments  
OBSERVE H1, 400.1020395 MHz  
DATA PROCESSING  
Sine bell 0.064 sec  
F1 DATA PROCESSING  
Sine bell 0.008 sec  
FT size 1024 x 2048  
Total time 12 hr, 25 min, 35 sec

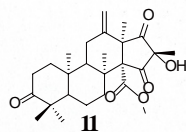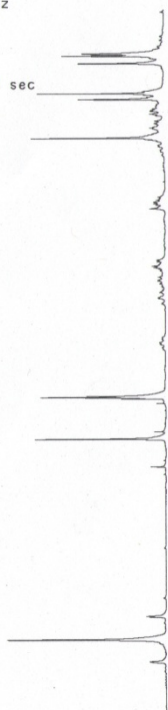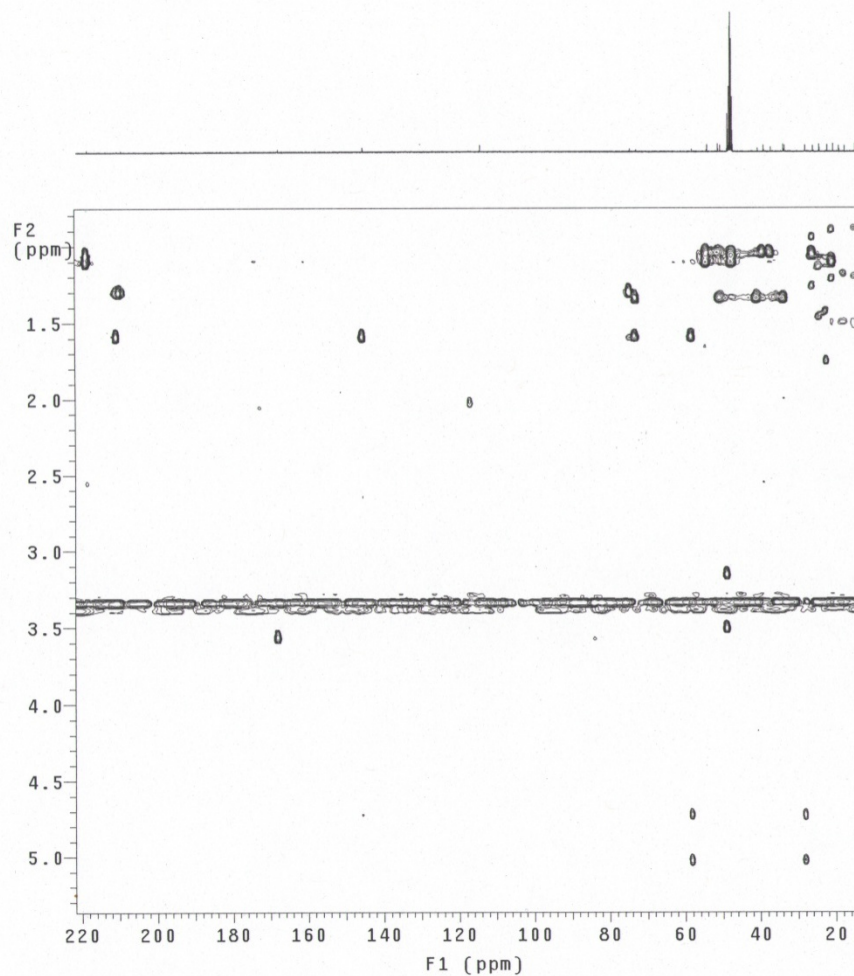

Figure S31. HMBC spectrum of compound 11

KB83CFB3

Automation directory: /home/walkup/auto\_2012.09.28  
Sample id : s\_20110514\_001  
Sample : KB83CFB3

Pulse Sequence: gCOSY  
Solvent: cd3od  
Temp. 50.0 C / 323.1 K  
Operator: walkup  
File: Ccosy\_01  
Mercury-400BB "MVX"

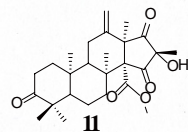

Relax. delay 1.301 sec  
Mixing 0.080 sec  
Acq. time 0.194 sec  
Width 2636.4 Hz  
2D Width 2636.4 Hz  
64 repetitions  
128 increments  
OBSERVE H1, 400.1020395 MHz  
DATA PROCESSING  
Sine bell 0.097 sec  
F1 DATA PROCESSING  
Sine bell 0.097 sec  
FT size 2048 x 2048  
Total time 3 hr, 33 min, 57 sec

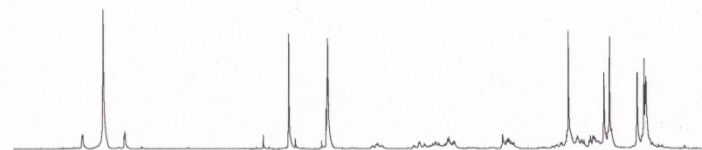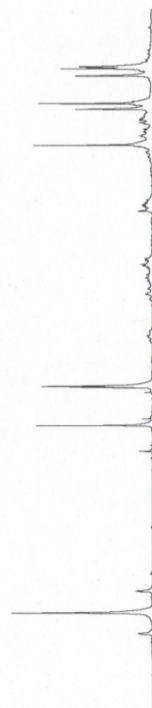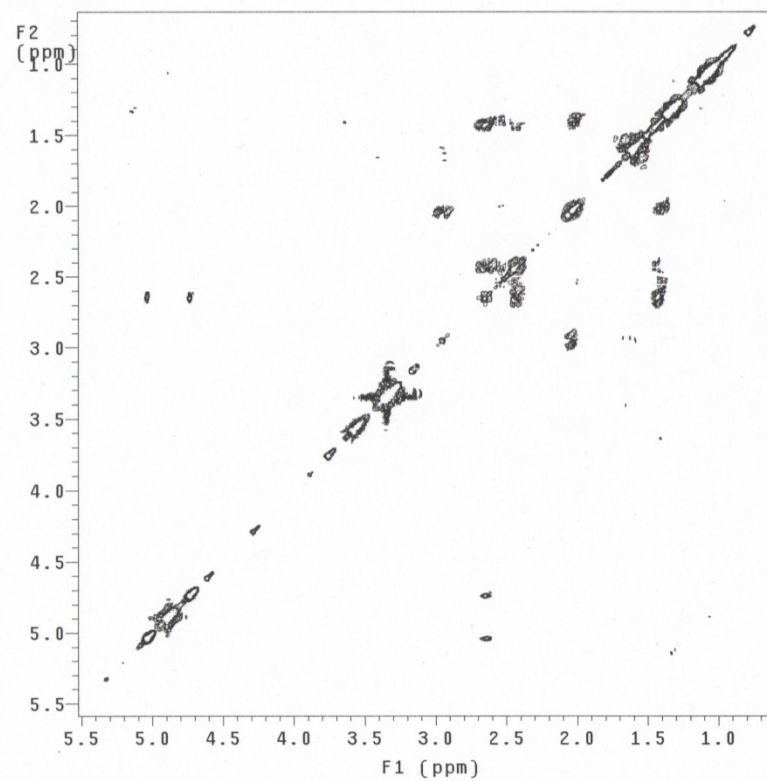

Figure S32. COSY spectrum of compound **11**

KB83CFB3

Automation directory: /home/walkup/auto\_2012.09.28  
Sample id : s\_20110514\_001  
Sample : KB83CFB3

Pulse Sequence: NOESY

Solvent: cd3od  
Temp. 50.0 C / 323.1 K  
Operator: walkup  
File: Noesy\_01  
Mercury-400BB "MVX"

Relax. delay 1.000 sec  
Mixing 0.300 sec  
Acq. time 0.194 sec  
Width 2636.4 Hz  
2D Width 2636.4 Hz  
64 repetitions  
2 x 128 increments  
OBSERVE H1, 400.1020395 MHz  
DATA PROCESSING  
Gauss apodization 0.090 sec  
F1 DATA PROCESSING  
Gauss apodization 0.090 sec  
FT size 2048 x 2048  
Total time 7 hr, 8 min, 55 sec

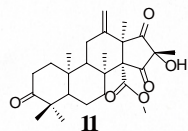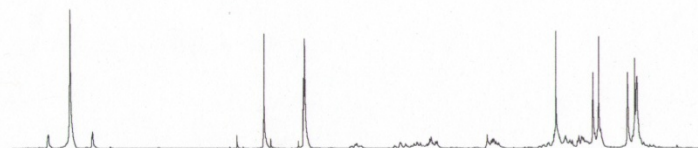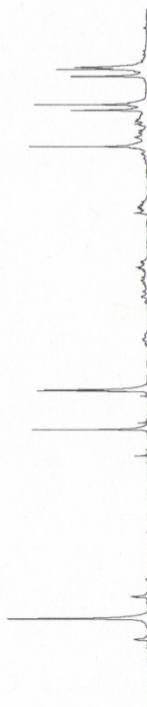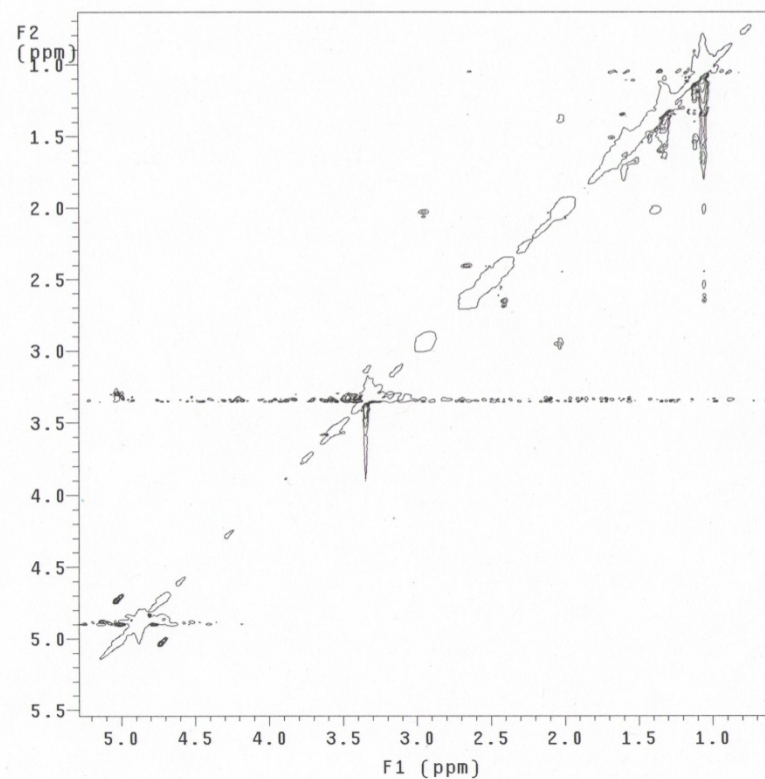

Figure S33. NOESY spectrum of compound **11**
